# Supplementary material
Source: publisher figshare collection journal article supplement (https://tandf.figshare.com/ndownloader/files/22910054)
Supplement: Supplementary file 1 [file 22910054]

Microwave-assisted and Catalyst-free Sulfenylation of Imidazo[2,1-b]thiazoles with Sulfonyl Hydrazides in Water

Shaohua Wang, a,b * Run Luo,a Lina Guo, a Tianxi Zhu,a Xu Chena and Wenjie Liua,b *

aSchool of Chemistry and Chemical Engineering, Guangdong Pharmaceutical University, Guangzhou 510006, P.R. of China;

b Guangdong Cosmetics Engineering & Technology Research Center, Guangzhou, 510006, P.R. of China.

Email: wangshaohua108@163.com, wjliu1113@126.com

**Supplemental Materials**

**1. Typical procedure for the synthesis of** **3a**

A 5-mL glass pressure vial was charged with 3-methyl-6-phenylimidazo[2,1-*b*]thiazole **1a** (0.2 mmol), *p*-toluenesulfonyl hydrazide **2a** (0.24 mmol) and water (2 mL). The vial was sealed with a PTFE/silicone septum and heated to 120 °C for 20 min under microwave irradiation (300 W). The reaction mixture was allowed to cool to room and diluted with ethyl acetate (20 mL). The resulting solution was washed with brine (2×8 mL), dried over anhydrous MgSO4. The solvent was removed and the crude product was separated by column chromatography (eluted with petroleum ether : ethyl acetate=6 : 1) to afford target arylation product **3a**.

**2. Analytical data for 3a-3r and 5a-5f**

**5-(p-tolylthio)-3-methyl-6-phenylimidazo[2,1-b]thiazole(3a)**

White solid, m. p. 158-159 °C. 1H NMR (400 MHz, CDCl3) δ 8.05 (d, *J* = 8.0 Hz, 2H), 7.39 (t, *J* = 7.4 Hz, 2H), 7.34-7.30 (m, 1H), 7.07 (d, *J* = 8.0 Hz, 2H), 6.96 (d, *J* = 8.0 Hz, 2H), 6.34 (s, 1H), 2.53 (s, 3H), 2.29 (s, 3H). 13C NMR (100 MHz, CDCl3) δ 153.6, 153.1, 135.6, 135.2, 133.7, 131.3, 130.3, 128.3, 128.1, 127.9, 125.2, 108.8, 107.6, 20.9, 14.4. ESI-MS (m/z) 337 [M+H]+. Anal. calcd. C, 67.82; H, 4.79; N, 8.33; Found: C, 67.71 H, 4.74; N, 8.24.

**3-methyl-6-phenyl-5-(phenylthio)imidazo[2,1-b]thiazole(3b)**

White solid, m. p. 110-112 °C. 1H NMR (400 MHz, CDCl3) δ 8.02 (d, *J* = 7.6 Hz, 2H), 7.35 (t, *J* = 7.4 Hz, 2H), 7.30-7.28 (m, 1H), 7.23-7.19 (m, 2H), 7.11-7.08 (m, 1H), 7.04-7.02 (m, 2H), 6.29 (s, 1H), 2.46 (s, 3H). 13C NMR (100 MHz, CDCl3) δ 153.8, 153.3, 138.8, 133.6, 131.3, 129.5, 128.3, 128.1, 127.9, 125.8, 125.1, 107.8, 14.3. ESI-MS (m/z) 323 [M+H]+. Anal. calcd. C, 67.05; H, 4.38; N, 8.69; Found: C, 66.94; H, 4.34; N, 8.58.

**5-(2,4-dimethylphenylthio)-3-methyl-6-phenylimidazo[2,1-b]thiazole(3c)**

White solid, m. p. 167-169 °C. 1H NMR (400 MHz, CDCl3) δ 7.98 (d, *J* = 6.8 Hz, 2H), 7.40-7.33 (m, 3H), 7.02 (s, 1H), 6.86 (d, *J* = 8.0 Hz, 1H), 6.58 (d, *J* = 8.0 Hz, 1H), 6.42 (s, 1H), 2.48 (s, 3H), 2.39 (s, 3H), 2.26 (s, 3H). 13C NMR (100 MHz, CDCl3) δ 153.9, 153.2, 135.1, 134.3, 133.7, 133.5, 131.5, 131.3, 128.3, 128.1, 127.91, 127.88, 124.8, 108.0, 107.6, 20.8, 19.6, 14.0. ESI-MS (m/z) 351 [M+H]+. Anal. calcd. C, 68.53; H, 5.18; N, 7.99; Found: C, 68.42; H, 5.14; N, 7.88.

**5-(4-fluorophenylthio)-3-methyl-6-phenylimidazo[2,1-b]thiazole(3d)**

White solid, m. p. 118-120 °C. 1H NMR (400 MHz, CDCl3) δ 8.04 (d, *J* = 7.2 Hz, 2H), 7.39-7.30 (m, 3H), 7.03-6.93 (m, 4H), 6.34 (s, 1H), 2.51 (s, 3H). 13C NMR (100 MHz, CDCl3) δ 161.3 (d, *J* = 244.1 Hz), 153.8, 153.3, 133.7 (d, *J* = 3.1 Hz), 133.5, 131.1, 128.4, 128.2, 127.9, 126.9 (d, *J* = 7.8 Hz), 116.7 (d, *J* = 22.1 Hz), 107.9, 14.4. ESI-MS (m/z) 341 [M+H]+. Anal. calcd. C, 63.50; H, 3.85; N, 8.23; Found: C, 63.41; H, 3.80; N, 8.15.

**5-(2-chlorophenylthio)-3-methyl-6-phenylimidazo[2,1-b]thiazole(3e)**

White solid, m. p. 152-153 °C. 1H NMR (400 MHz, CDCl3) δ 7.98 (d, *J* = 7.6 Hz, 2H), 7.40-7.30 (m, 4H), 7.08 (t, *J* = 3.2 Hz, 2H), 6.70 (t, *J* = 3.4 Hz, 1H), 6.38 (s, 1H), 2.47 (s, 3H). 13C NMR (100 MHz, CDCl3) δ 154.5, 153.7, 137.7, 133.4, 131.2, 130.0, 129.8, 128.4, 128.3, 127.8, 127.8, 126.6, 126.3, 108.0, 106.8, 14.1. ESI-MS (m/z) 357 [M+H]+. Anal. calcd. C, 60.58; H, 3.67; N, 7.85; Found: C, 60.47; H, 3.63; N, 7.75.

**5-(4-chlorophenylthio)-3-methyl-6-phenylimidazo[2,1-b]thiazole(3f)**

White solid, m. p. 138-140 °C. 1H NMR (400 MHz, CDCl3) δ 7.99 (d, *J* = 8.0 Hz, 2H), 7.37 (t, *J* = 7.4 Hz, 2H), 7.33-7.29 (m, 1H), 7.21 (d, *J* = 8.0 Hz, 2H), 6.97 (d, *J* = 8.0 Hz, 2H), 6.36 (s, 1H), 2.49 (s, 3H). 13C NMR (100 MHz, CDCl3) δ 154.0, 153.5, 137.3, 133.4, 131.7, 131.1, 129.6, 129.3, 129.1, 128.3, 127.8, 126.3, 108.0, 14.3. ESI-MS (m/z) 357 [M+H]+. Anal. calcd. C, 60.58; H, 3.67; N, 7.85; Found: C, 60.48; H, 3.63; N, 7.74.

**5-(4-bromophenylthio)-3-methyl-6-phenylimidazo[2,1-b]thiazole(3g)**

White solid, m. p. 137-139 °C. 1H NMR (400 MHz, CDCl3) δ 7.96 (d, *J* = 7.2 Hz, 2H), 7.36-7.28 (m, 5H), 6.87 (d, *J* = 8.4 Hz, 2H), 6.31 (s, 1H), 2.44 (s, 3H). 13C NMR (100 MHz, CDCl3) δ 154.1, 153.5, 138.0, 133.4, 132.6, 131.1, 128.4, 128.3, 127.9, 126.9, 126.6, 119.5, 108.0, 14.4. ESI-MS (m/z) 401 [M+H]+. Anal. calcd. C, 53.87; H, 3.26; N, 6.98; Found: C, 53.79; H, 3.22; N, 6.87.

**5-(2-methoxyphenylthio)-3-methyl-6-phenylimidazo[2,1-b]thiazole(3h)**

White solid, m. p. 155-156 °C. 1H NMR (400 MHz, CDCl3) δ 7.98 (d, *J* = 7.6 Hz, 2H), 7.39-7.27 (m, 3H), 7.12 (t, *J* = 7.6 Hz, 1H), 6.89 (d, *J* = 8.0 Hz, 1H), 6.81 (t, *J* = 7.6 Hz, 1H), 6.63(d, *J* = 7.6 Hz, 1H), 6.35 (s, 1H), 3.92 (s, 3H), 2.50 (s, 3H). 13C NMR (100 MHz, CDCl3) δ 155.0, 154.0, 153.3, 133.7, 131.4, 128.3, 128.0, 127.9, 127.2, 126.5, 125.7, 121.8, 110.8, 107.6, 55.9, 14.1. ESI-MS (m/z) 353 [M+H]+. Anal. calcd. C, 64.74; H, 4.58; N, 7.95; Found: C, 64.65; H, 4.53; N, 7.82.

**3-methyl-6-phenyl-5-(pyridin-4-ylthio)imidazo[2,1-b]thiazole(3i)**

Yellow oil. 1H NMR (400 MHz, CDCl3) δ 8.41 (d, *J* = 4.4 Hz, 2H), 7.91 (d, *J* = 7.2 Hz, 2H), 7.39-7.34 (m, 3H), 6.96 (d, *J* = 4.8Hz, 2H), 6.42 (s, 1H), 2.47 (s, 3H). 13C NMR (100 MHz, CDCl3) δ 154.8, 154.0, 150.3, 150.0, 133.1, 130.9, 128.5, 128.4, 127.9, 119.6, 108.4, 104.9, 14.2. ESI-MS (m/z) 324 [M+H]+. Anal. calcd. C, 63.13; H, 4.05; N, 12.99; Found: C, 62.97; H, 3.98; N, 12.85.

**5-(p-tolylthio)-3-methyl-6-p-tolylimidazo[2,1-b]thiazole(3j)**

White solid, m. p. 179-180 °C. 1H NMR (400 MHz, CDCl3) δ 7.92 (d, *J* = 8.4 Hz, 2H), 7.19 (d, *J* = 7.6 Hz, 2H), 7.06 (d, *J* = 8.0 Hz, 2H), 6.95 (d, *J* = 8.4 Hz, 2H), 6.34 (s, 1H), 2.52 (s, 3H), 2.35 (s, 3H), 2.28 (s, 3H). 13C NMR (100 MHz, CDCl3) δ 153.8, 153.0, 137.9, 135.6, 135.3, 131.3, 130.8, 130.2, 129.0, 127.8, 125.2, 108.4, 107.4, 21.3, 20.9, 14.4. ESI-MS (m/z) 351 [M+H]+. Anal. calcd. C, 68.53; H, 5.18; N, 7.99; Found: C, 68.44; H, 5.14; N, 7.89.

**5-(p-tolylthio)-6-(4-fluorophenyl)-3-methylimidazo[2,1-b]thiazole(3k)**

White solid, m. p. 114-116 °C. 1H NMR (400 MHz, CDCl3) δ 8.04 (dd, *J* = 8.8 Hz, *J* = 5.6 Hz, 2H), 7.08-7.03 (m, 4H), 6.94 (dd, *J* = 6.4 Hz, *J* = 2.0 Hz, 2H), 6.32 (s, 1H), 2.50 (s, 3H), 2.27 (s, 3H). 13C NMR (100 MHz, CDCl3) δ 162.7 (d, *J* = 246.1 Hz), 153.1, 152.7, 135.8, 135.0, 131.3, 130.4 129.9 (d, *J* = 3.1 Hz), 129.7 (d, *J* = 8.0 Hz), 125.2, 115.2 (d, *J* = 21.3 Hz), 108.6, 107.7, 20.9, 14.4. ESI-MS (m/z) 355 [M+H]+. Anal. calcd. C, 64.38; H, 4.27; N, 7.90; Found: C, 64.30; H, 4.22; N, 7.78.

**5-(p-tolylthio)-6-(4-chlorophenyl)-3-methylimidazo[2,1-b]thiazole(3l)**

White solid, m. p. 169-171 °C. 1H NMR (400 MHz, CDCl3) δ 8.00 (d, *J* = 7.6 Hz, 2H), 7.34 (d, *J* = 8.0 Hz, 2H), 7.06 (d, *J* = 7.6 Hz, 2H), 6.93 (d, *J* = 7.6 Hz, 2H), 6.36 (s, 1H), 2.53 (s, 3H), 2.28 (s, 3H). 13C NMR (100 MHz, CDCl3) δ 153.2, 152.4, 135.8, 134.8, 134.0, 132.2, 131.3, 130.3, 129.1, 128.5, 125.2, 109.1, 107.8, 20.9, 14.4. ESI-MS (m/z) 371 [M+H]+. Anal. calcd. C, 61.52; H, 4.08; N, 7.55; Found: C, 61.43; H, 4.03; N, 7.44.

**5-(p-tolylthio)-6-(4-methoxyphenyl)-3-methylimidazo[2,1-b]thiazole(3m)**

White solid, m. p. 218-220 °C. 1H NMR (400 MHz, CDCl3) δ 7.98 (d, *J* = 8.8 Hz, 2H), 7.06 (d, *J* = 8.4 Hz, 2H), 6.95 (d, *J* = 8.4 Hz, 2H), 6.91 (d, *J* = 8.8 Hz, 2H), 6.31 (s, 1H), 3.81 (s, 3H), 2.51 (s, 3H), 2.28 (s, 3H). 13C NMR (100 MHz, CDCl3) δ 159.6, 153.6, 153.0, 135.6, 135.4, 131.3, 130.3, 129.2, 126.4, 125.2, 107.8, 107.2, 55.3, 20.9, 14.4. ESI-MS (m/z) 367 [M+H]+. Anal. calcd. C, 65.54; H, 4.95; N, 7.64; Found: C, 65.44; H, 4.91; N, 7.55.

**5-(p-tolylthio)-2-methyl-6-phenylimidazo[2,1-b]thiazole(3n)**

White solid, m. p. 158-160 °C. 1H NMR (400 MHz, CDCl3) δ 8.10 (d, *J* = 7.6 Hz, 2H), 7.38 (t, *J* = 7.4 Hz, 2H), 7.30 (t, *J* = 7.4 Hz, 1H), 7.13 (s, 1H), 7.05 (d, *J* = 8.4 Hz, 2H), 6.98 (d, *J* = 8.0 Hz, 2H), 2.39 (s, 3H), 2.28 (s, 3H). 13C NMR (100 MHz, CDCl3) δ 151.1, 150.7, 136.0, 133.7, 132.4, 130.2, 128.4, 127.9, 127.3, 127.1, 126.0, 114.6, 107.8, 20.9, 14.2. ESI-MS (m/z) 337 [M+H]+. Anal. calcd. C, 67.82; H, 4.79; N, 8.33; Found: C, 67.71; H, 4.75; N, 8.24.

**5-(p-tolylthio)-6-phenylimidazo[2,1-b]thiazole(3o)**

Pale yellow oil. 1H NMR (400 MHz, CDCl3) δ 8.16 (d, *J* = 7.6 Hz, 2H), 7.43-7.31 (m, 4H), 7.04 (d, *J* = 7.6 Hz, 2H), 6.99 (d, *J* = 8.0 Hz, 2H), 6.76 (d, *J* = 4.0 Hz, 1H), 2.27 (s, 3H). 13C NMR (100 MHz, CDCl3) δ 152.3, 151.3, 136.2, 133.7, 132.2, 130.2, 128.4, 128.1, 127.5, 126.2, 118.1, 113.0, 108.4, 21.0. ESI-MS (m/z) 323 [M+H]+. Anal. calcd. C, 67.05; H, 4.38; N, 8.69; Found: C, 66.95; H, 4.33; N, 8.60.

**5-(p-tolylthio)-6-(4-chlorophenyl)imidazo[2,1-b]thiazole(3p)**

White solid, m. p. 163-165 °C.1H NMR (400 MHz, CDCl3) δ 8.10 (d, *J* = 8.8 Hz, 2H), 7.38-7.34 (m, 3H), 7.04 (d, *J* = 8.0 Hz, 2H), 6.96 (d, *J* = 8.4 Hz, 2H), 6.79 (d, *J* = 4.8 Hz, 1H), 2.26 (s, 3H). 13C NMR (100 MHz, CDCl3) δ 151.3, 151.0, 136.4, 133.9, 132.2, 131.8, 130.3, 128.7, 128.6, 126.3, 118.0, 113.2, 108.7, 21.0, ESI-MS (m/z) 357 [M+H]+. Anal. calcd. C, 60.58; H, 3.67; N, 7.85; Found: C, 60.49; H, 3.62; N, 7.73.

**2-phenyl-3-(p-tolylthio)benzo[d]imidazo[2,1-b]thiazole(3q)**

White solid, m. p. 116-118 °C. 1H NMR (400 MHz, CDCl3) δ 8.33 (d, *J* = 7.6 Hz, 1H), 8.11 (d, *J* = 7.2 Hz, 2H), 7.63 (d, *J* = 7.6 Hz, 1H), 7.39 (t, *J* = 7.4 Hz, 2H), 7.34-7.23 (m, 3H), 7.07-7.01 (m, 4H), 2.23 (s, 3H). 13C NMR (100 MHz, CDCl3) δ 153.4, 150.6, 136.1, 133.5, 133.3, 132.9, 130.4, 130.2, 128.4, 128.3, 127.8, 126.4, 125.8, 124.9, 124.0, 114.5, 110.6, 21.0. ESI-MS (m/z) 373 [M+H]+. Anal. calcd. C, 70.93; H, 4.33; N, 7.52; Found: C, 70.82; H, 4.28; N, 7.41.

**2-p-tolyl-3-(p-tolylthio)benzo[d]imidazo[2,1-b]thiazole(3r)**

White solid, m. p. 161-163 °C. 1H NMR (400 MHz, CDCl3) δ 8.33 (m, 1H), 8.00 (d, *J* = 8.4 Hz, 2H), 7.65 (m, 1H), 7.33-7.24 (m, 2H), 7.21 (d, *J* = 8.0 Hz, 2H), 7.07-7.02 (m, 4H), 2.36 (s, 3H), 2.24 (s, 3H). 13C NMR (100 MHz, CDCl3) δ 153.6, 150.5, 138.2, 136.0, 133.5, 133.0, 130.3, 130.1, 129.1, 127.7, 126.3, 125.8, 124.8, 123.9, 114.4, 110.1, 21.4, 20.9. ESI-MS (m/z) 387 [M+H]+. Anal. calcd. C, 71.47; H, 4.69; N, 7.25; Found: C, 71.36; H, 4.63; N, 7.17.

**3-methyl-5-(methylthio)-6-phenylimidazo[2,1-b]thiazole(5a)**

Pale yellow oil. 1H NMR (400 MHz, CDCl3) δ 8.13 (d, *J* = 7.6 Hz, 2H), 7.44 (t, *J* = 7.6 Hz, 2H), 7.34-7.31 (m, 1H), 6.35 (s, 1H), 2.74 (s, 3H), 2.29 (s, 3H). 13C NMR (100 MHz, CDCl3) δ 151.8, 151.1, 134.2, 131.0, 128.3, 127.8, 127.7, 114.2, 107.5, 22.3, 14.7. ESI-MS (m/z) 261 [M+H]+. Anal. calcd. C, 59.97; H, 4.65; N, 10.76; Found: C, 59.88; H, 4.61; N, 10.64.

**3-methyl-5-(methylthio)-6-p-tolylimidazo[2,1-b]thiazole(5b)**

White solid, m. p. 131-133 °C. 1H NMR (400 MHz, CDCl3) δ 8.03 (d, *J* = 7.2 Hz, 2H), 7.25 (d, *J* = 7.6 Hz, 2H), 6.36 (s, 1H), 2.76 (s, 3H), 2.40 (s, 3H), 2.30 (s, 3H). 13C NMR (100 MHz, CDCl3) δ 151.7, 151.3, 137.5, 131.4, 131.0, 129.0, 127.7, 113.7, 107.3, 22.3, 21.3, 14.7. ESI-MS (m/z) 275 [M+H]+. Anal. calcd. C, 61.28; H, 5.14; N, 10.21; Found: C, 61.17; H, 5.09; N, 10.28.

**6-(4-chlorophenyl)-3-methyl-5-(methylthio)imidazo[2,1-b]thiazole(5c)**

White solid, m. p. 125-127 °C. 1H NMR (400 MHz, CDCl3) δ 8.10 (d, *J* = 7.6 Hz, 2H), 7.39 (d, *J* = 8.0 Hz, 2H), 6.39 (s, 1H), 2.76 (s, 3H), 2.29 (s, 3H). 13C NMR (100 MHz, CDCl3) δ 151.9, 149.8, 133.5, 132.7, 131.0, 129.0, 128.4, 114.3, 107.7, 22.2, 14.7. ESI-MS (m/z) 295 [M+H]+. Anal. calcd. C, 52.96; H, 3.76; N, 9.50; Found: C, 52.85; H, 3.71; N, 9.36.

**6-(4-methoxyphenyl)-3-methyl-5-(methylthio)imidazo[2,1-b]thiazole(5d)**

White solid, m. p. 138-140 °C. 1H NMR (400 MHz, CDCl3) δ 8.08 (d, *J* = 7.6 Hz, 2H), 6.97 (d, *J* = 8.0 Hz, 2H), 6.36 (s, 1H), 3.85 (s, 3H), 2.76 (s, 3H), 2.30 (s, 3H). 13C NMR (100 MHz, CDCl3) δ 159.3, 151.7, 151.1, 131.0, 129.1, 126.9, 113.7, 113.2, 107.1, 55.3, 22.3, 14.7. ESI-MS (m/z) 291 [M+H]+. Anal. calcd. C, 57.90; H, 4.86; N, 9.65; Found: C, 57.80; H, 4.82; N, 9.53.

**2-methyl-5-(methylthio)-6-phenylimidazo[2,1-b]thiazole(5e)**

White solid, m. p. 97-99 °C. 1H NMR (400 MHz, CDCl3) δ 8.16 (d, *J* = 7.6 Hz, 2H), 7.42 (t, *J* = 7.4 Hz, 2H), 7.33-7.28 (m, 2H), 2.44 (s, 3H), 2.28 (s, 3H). 13C NMR (100 MHz, CDCl3) δ 149.5, 148.7, 134.2, 128.3, 127.6, 127.2, 126.8, 114.5, 112.3, 19.4, 14.2. ESI-MS (m/z) 261 [M+H]+. Anal. calcd. C, 59.97; H, 4.65; N, 10.76; Found: C, 59.86; H, 4.61; N, 10.65.

**6-(4-chlorophenyl)-5-(methylthio)imidazo[2,1-b]thiazole(5f)**

Yellow oil. 1H NMR (400 MHz, CDCl3) δ 8.14 (d, *J* = 7.6 Hz, 2H), 7.57 (d, *J* = 3.2 Hz, 1H), 7.40 (d, *J* = 7.6 Hz, 2H), 6.90 (d, *J* = 3.2 Hz, 1H), 2.29 (s, 3H). 13C NMR (100 MHz, CDCl3) δ 150.3, 148.9, 133.6, 132.5, 128.6, 128.5, 117.8, 113.0, 19.3. ESI-MS (m/z) 281 [M+H]+. Anal. calcd. C, 51.33; H, 3.23; N, 9.98; Found: C, 51.23; H, 3.18; N, 9.86.


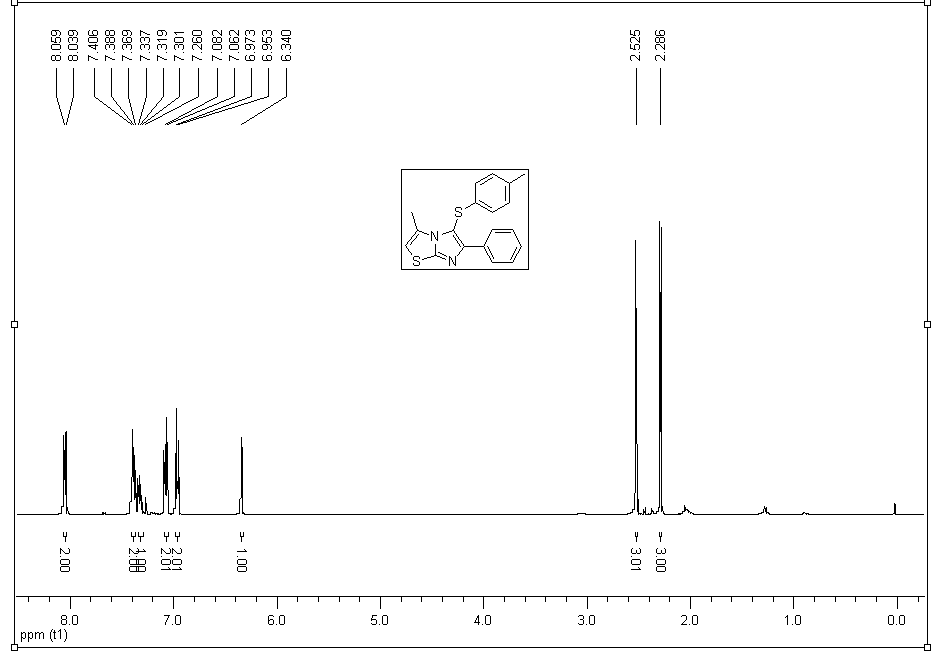


**Figure S 1:** 1H NMR of **3a**


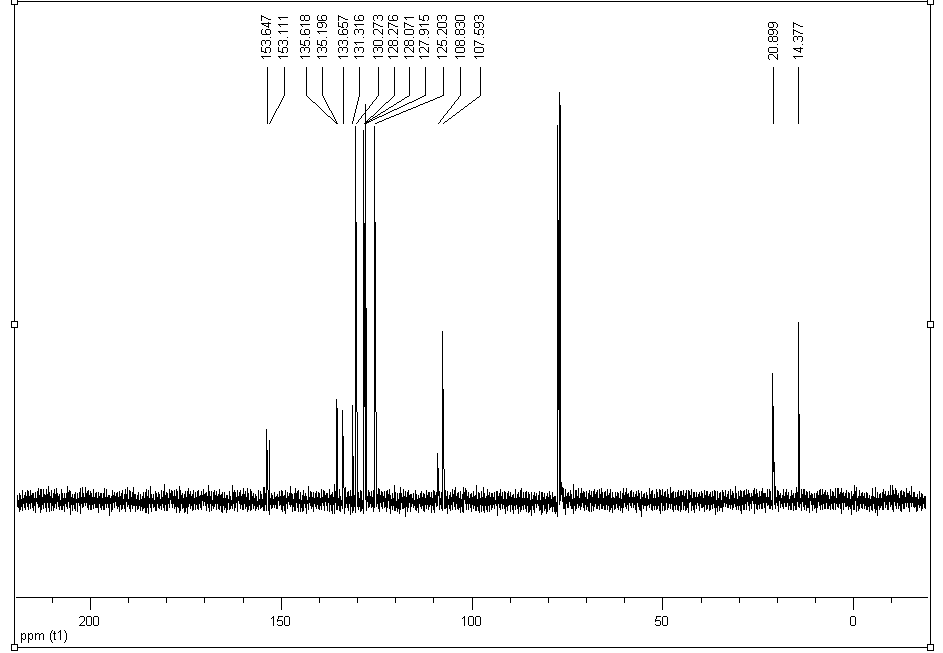


**Figure S 2:** 13C NMR of **3a**


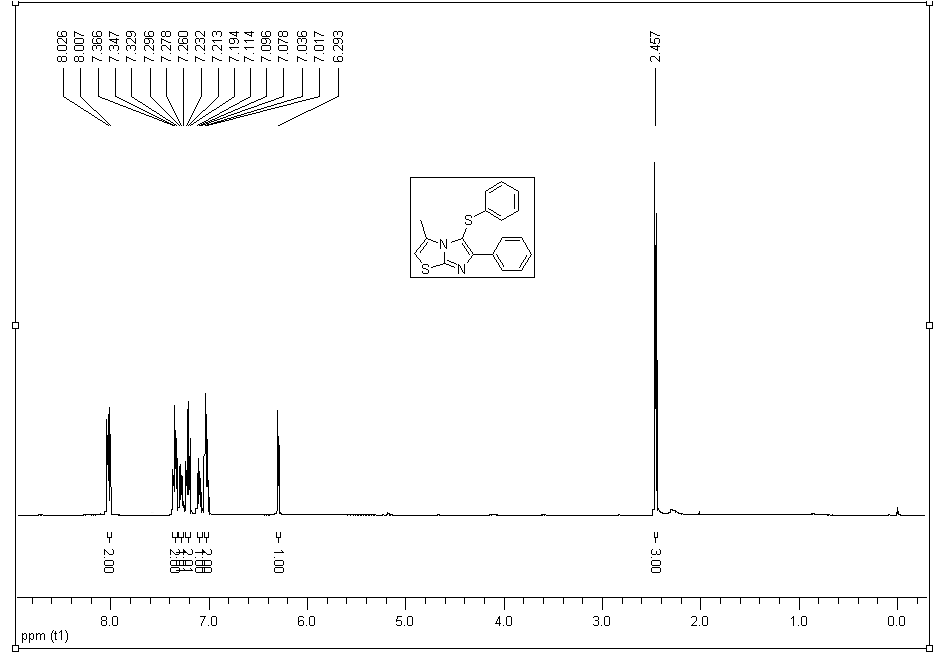


**Figure S 3:** 1H NMR of **3b**


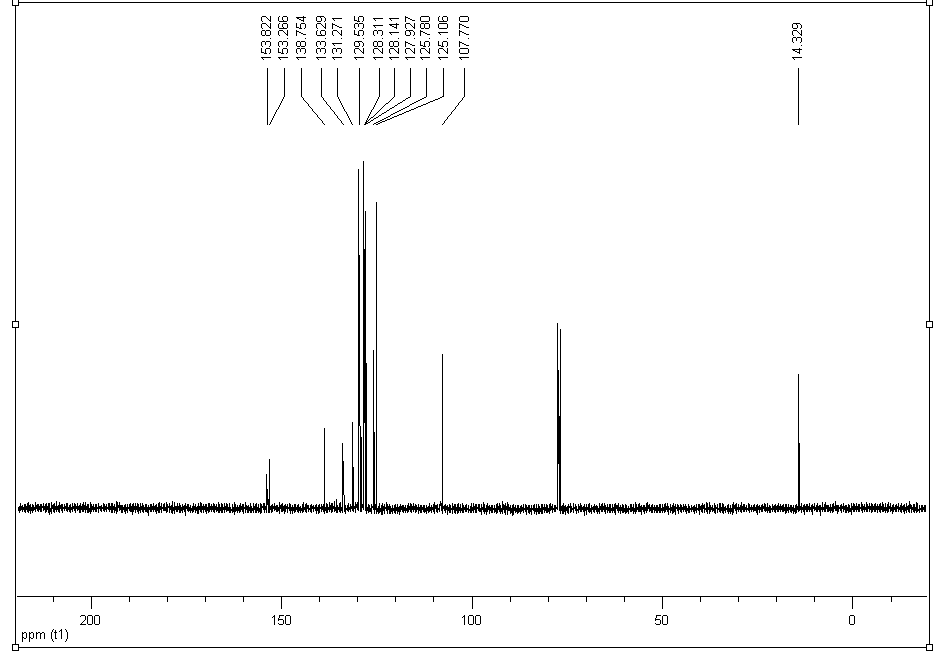


**Figure S 4:** 13C NMR of **3b**


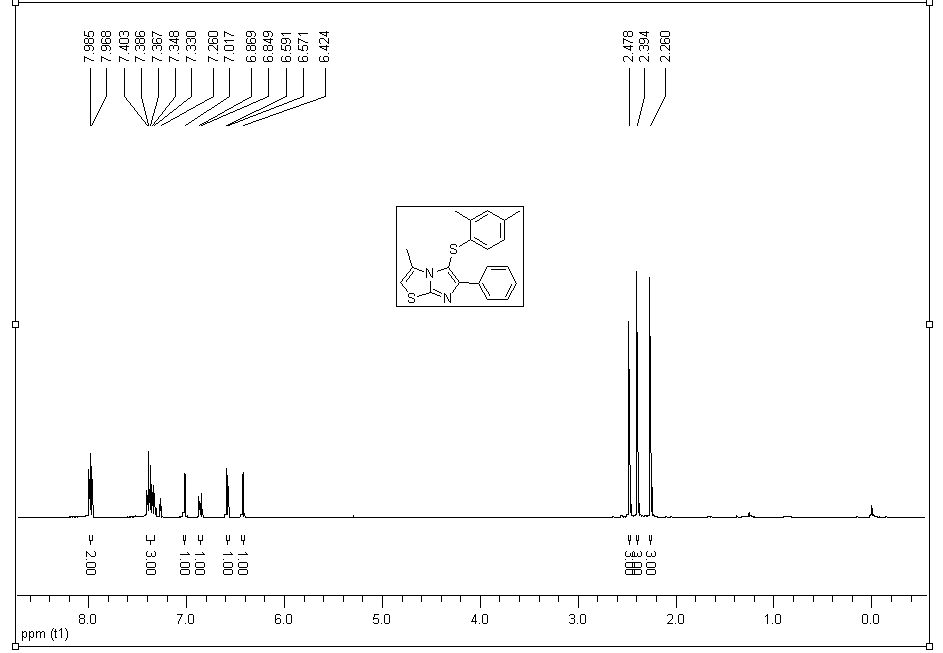


**Figure S 5:** 1H NMR of **3c**


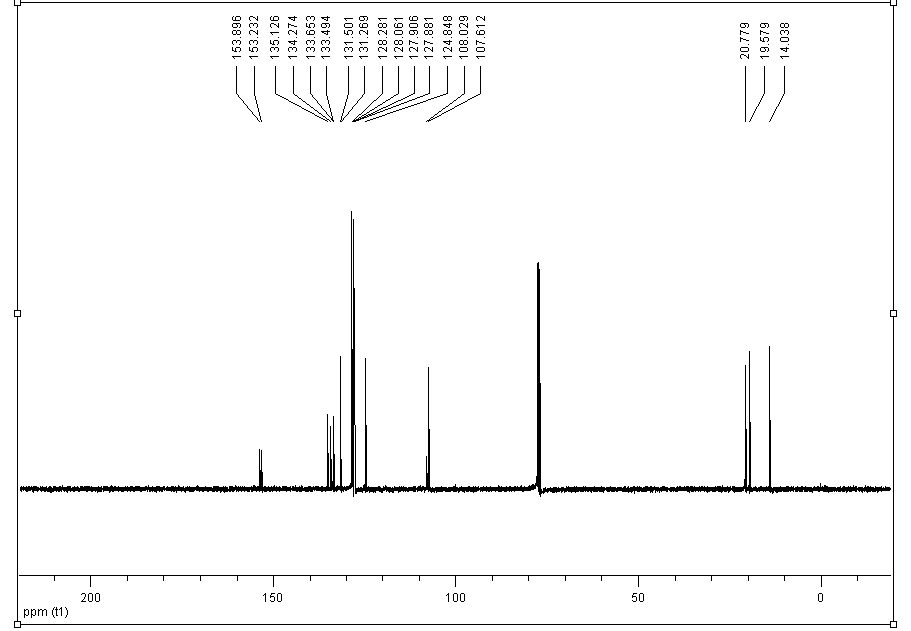


**Figure S 6:** 13C NMR of **3c**

**
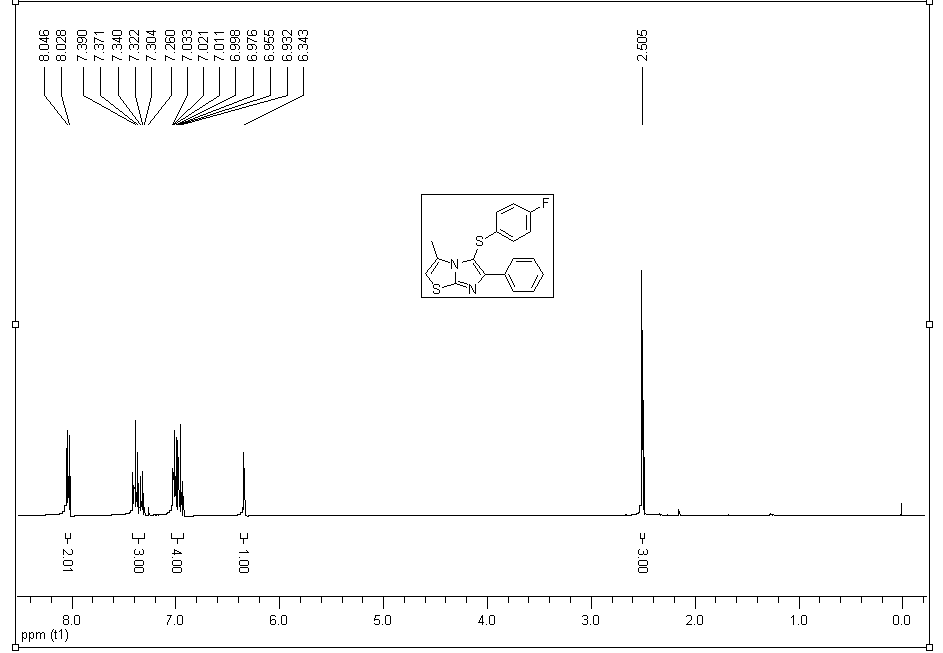
**

**Figure S 7:** 1H NMR of **3d**


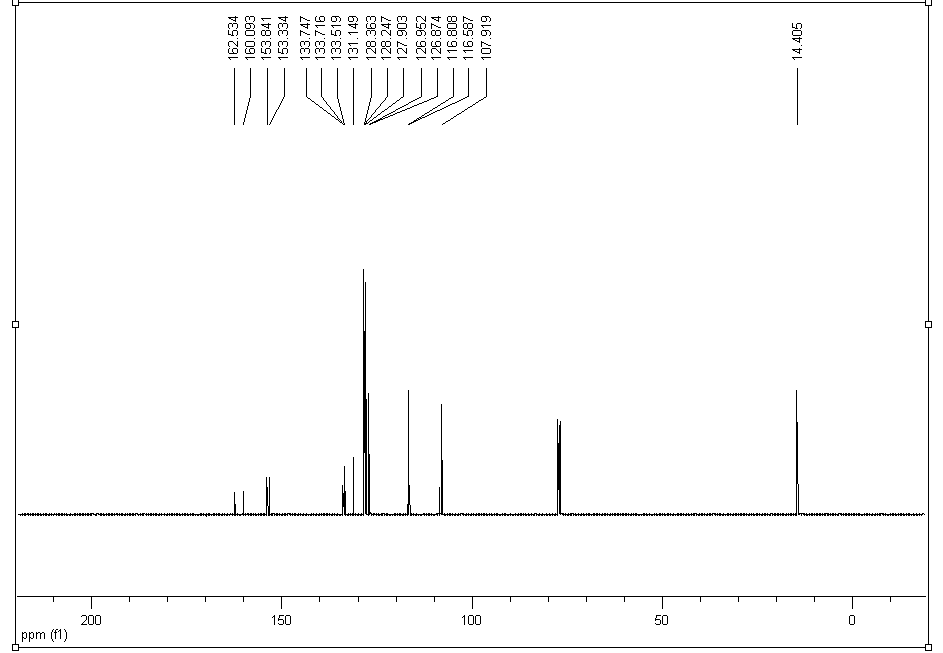


**Figure S 8:** 13C NMR of **3d**


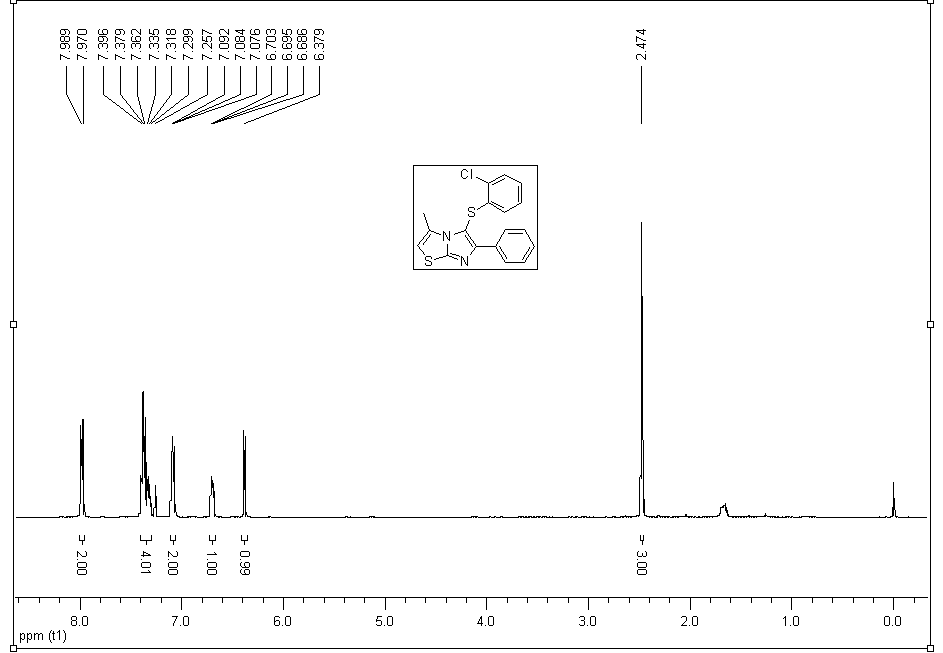


**Figure S 9:** 1H NMR of **3e**


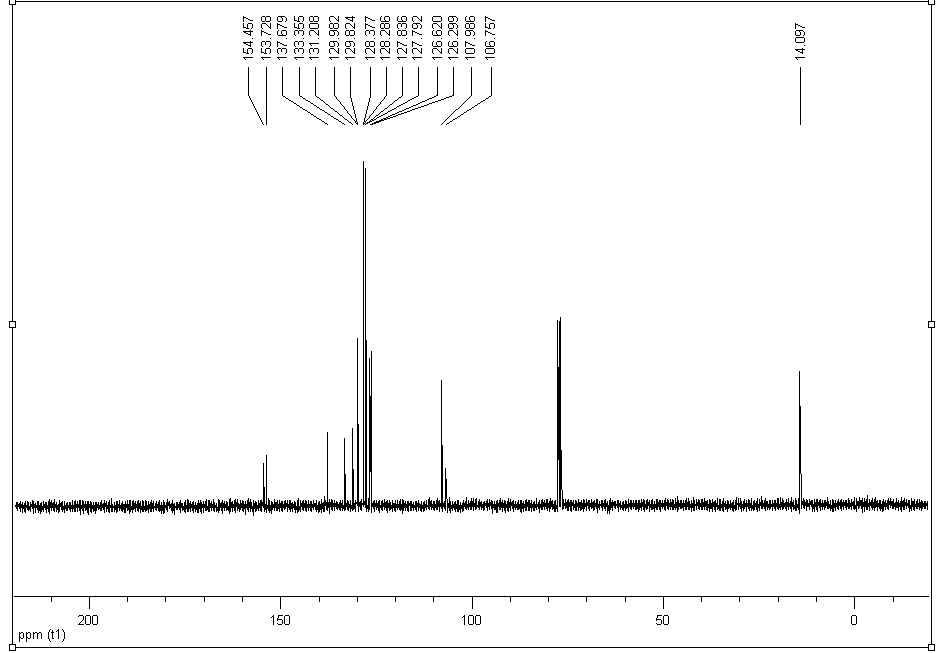


**Figure S 10:** 13C NMR of **3e**


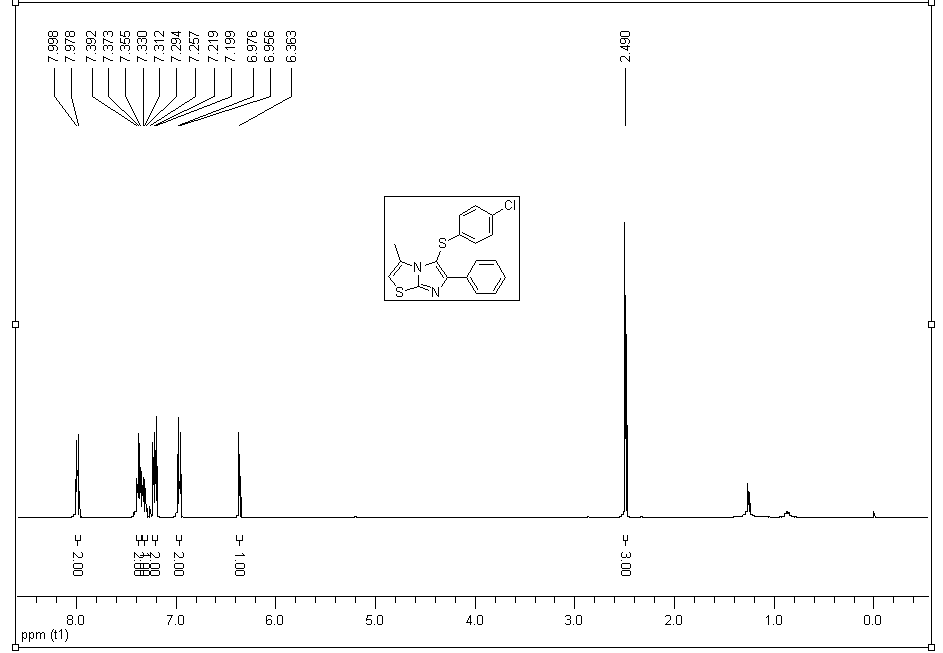


**Figure S 11:** 1H NMR of **3f**


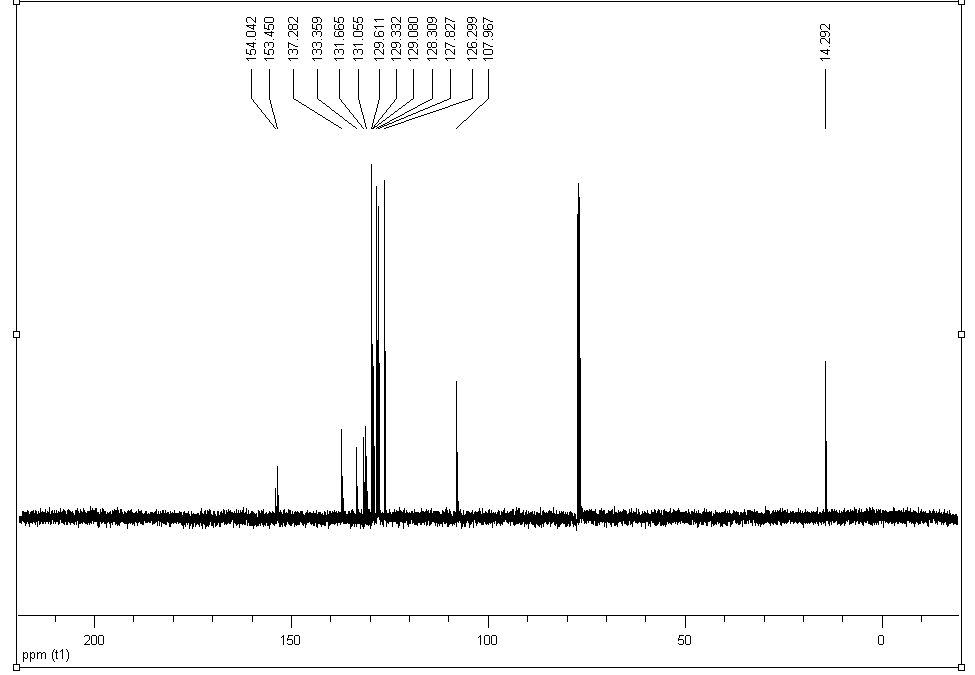


**Figure S 12:** 13C NMR of **3f**


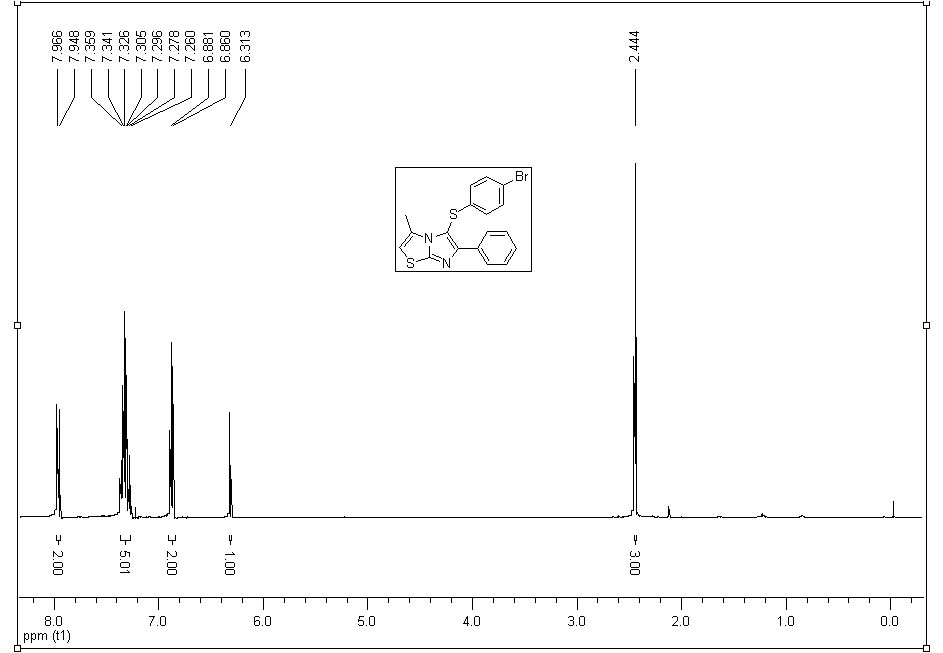


**Figure S 13:** 1H NMR of **3g**


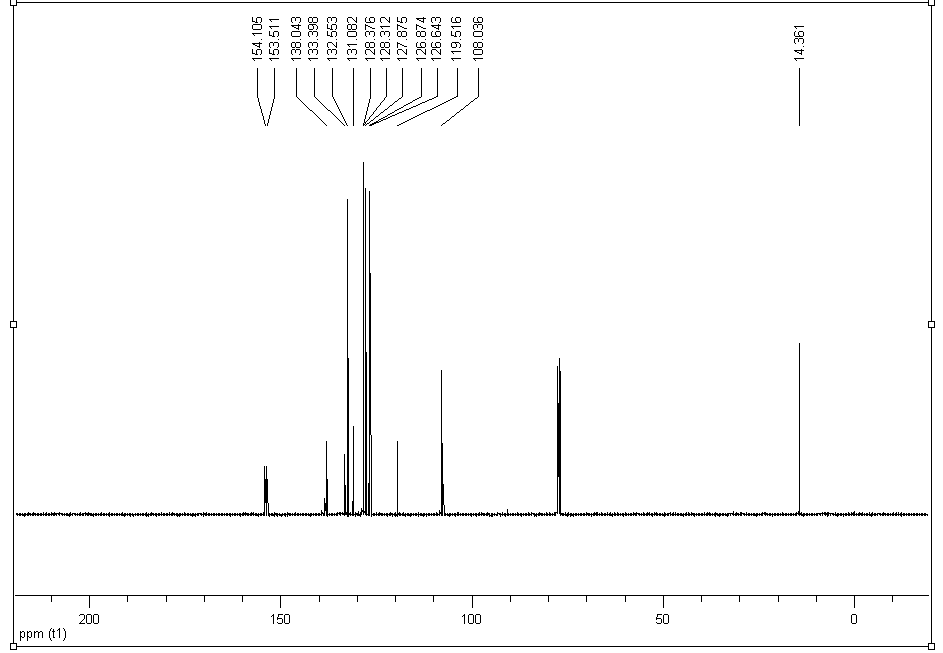


**Figure S 14:** 13C NMR of **3g**


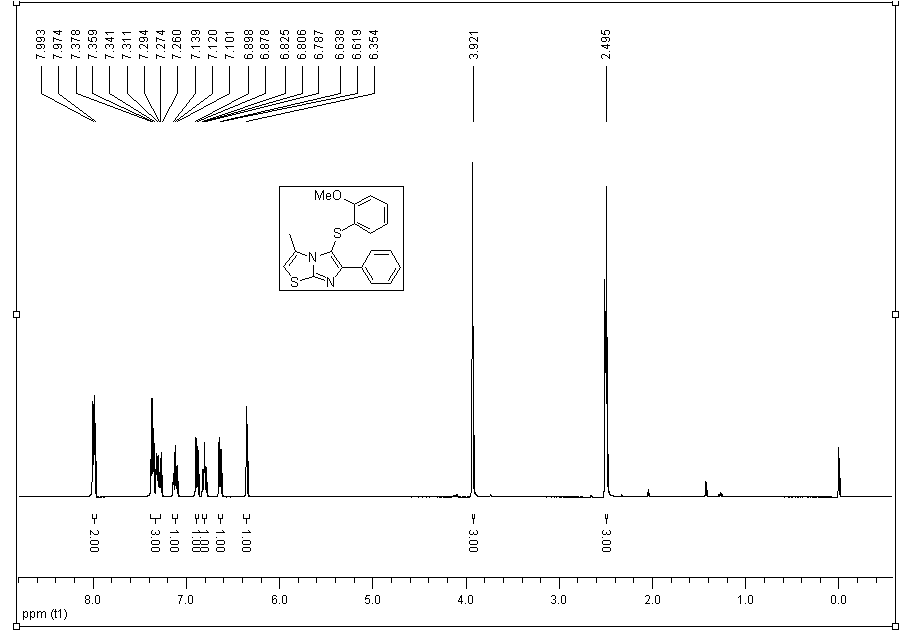


**Figure S 15:** 1H NMR of **3h**


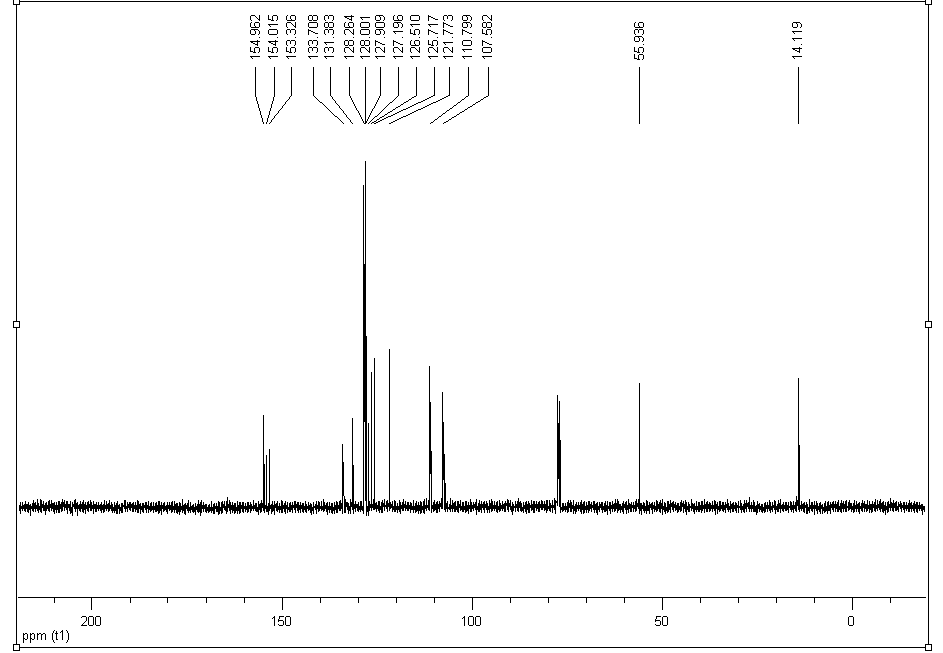


**Figure S 16:** 13C NMR of **3h**


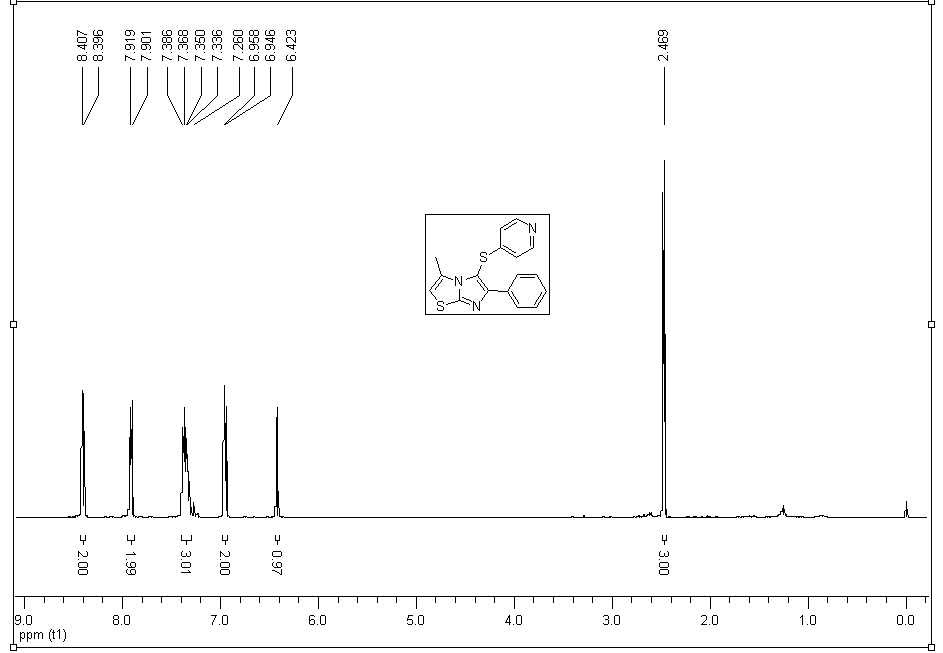


**Figure S 17:** 1H NMR of **3i**


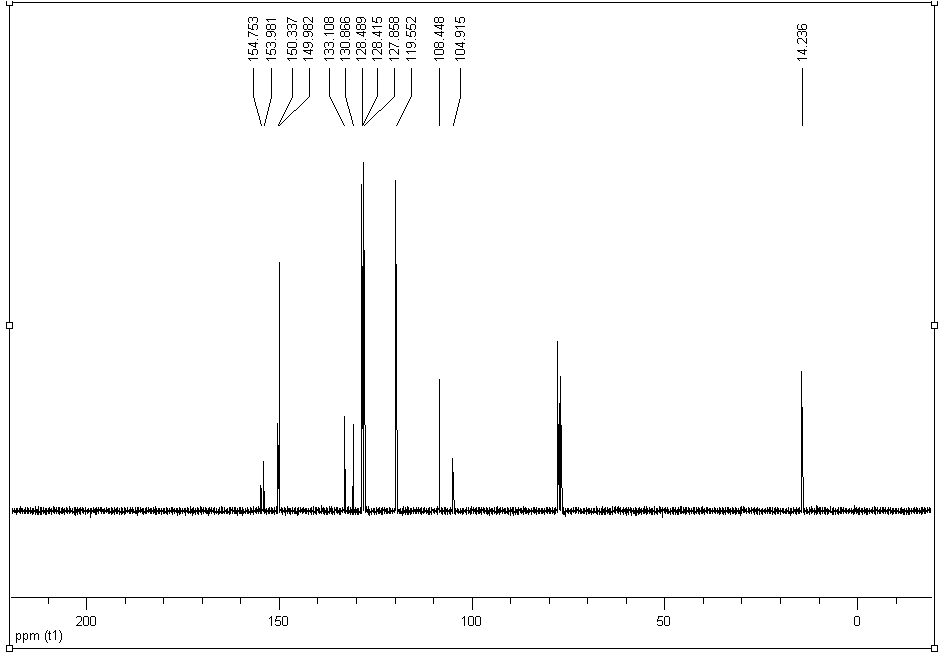


**Figure S 18:** 13C NMR of **3i**


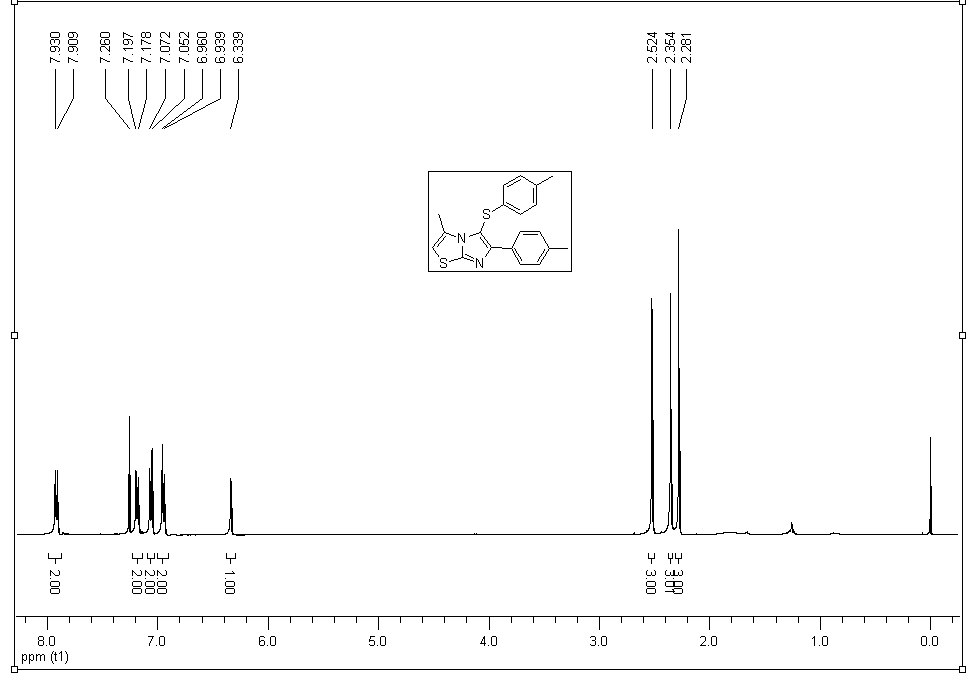


**Figure S 19:** 1H NMR of **3j**


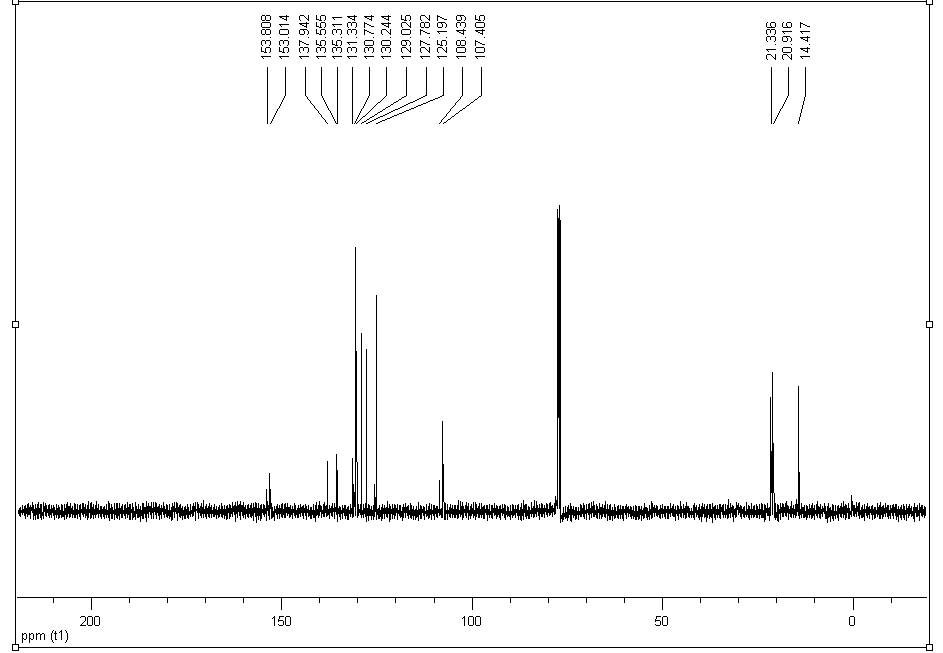


**Figure S 20:** 13C NMR of **3j**


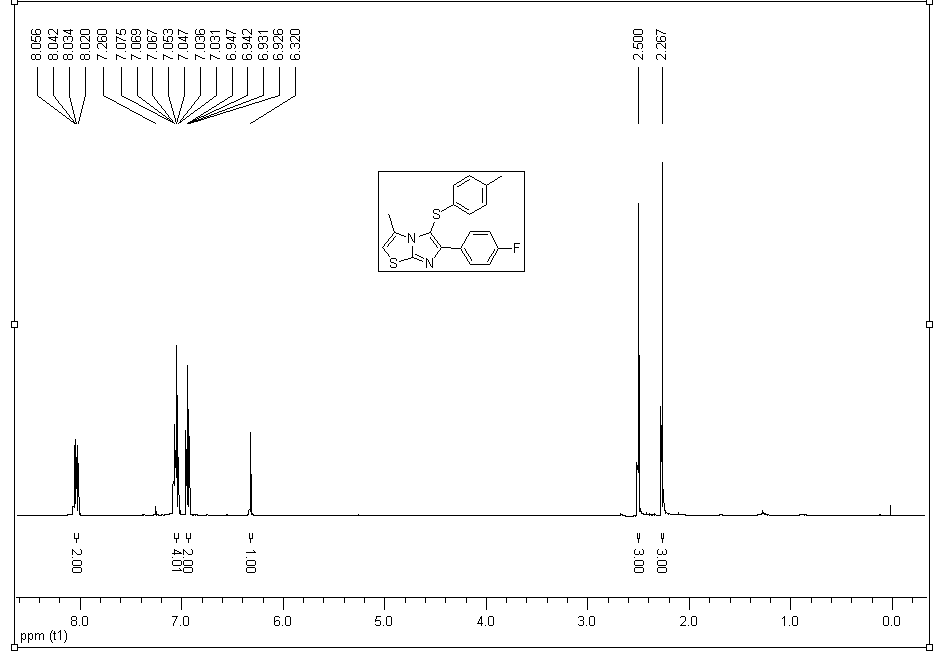


**Figure S 21:** 1H NMR of **3k**


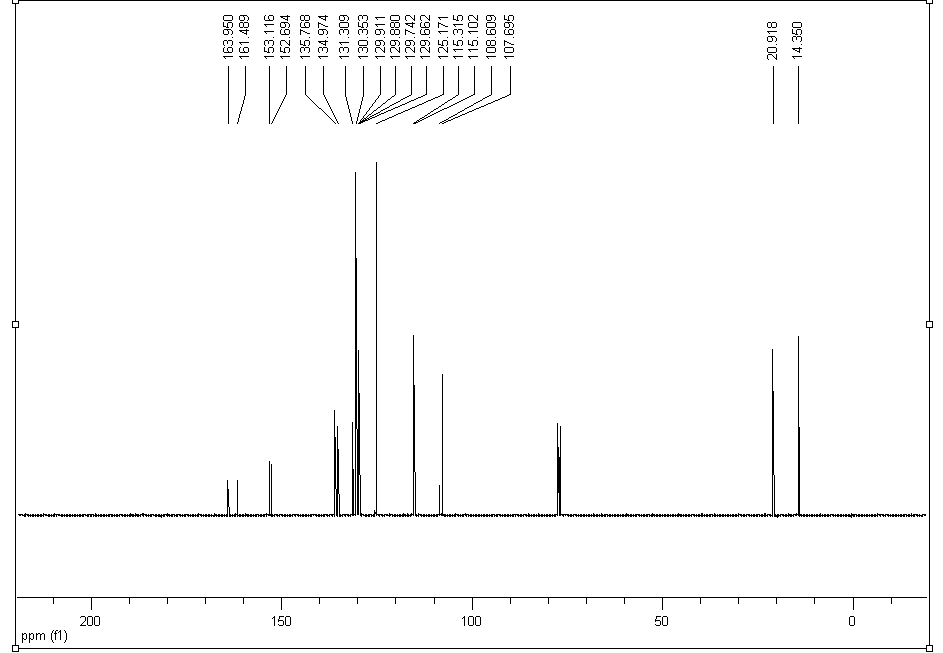


**Figure S 22:** 13C NMR of **3k**


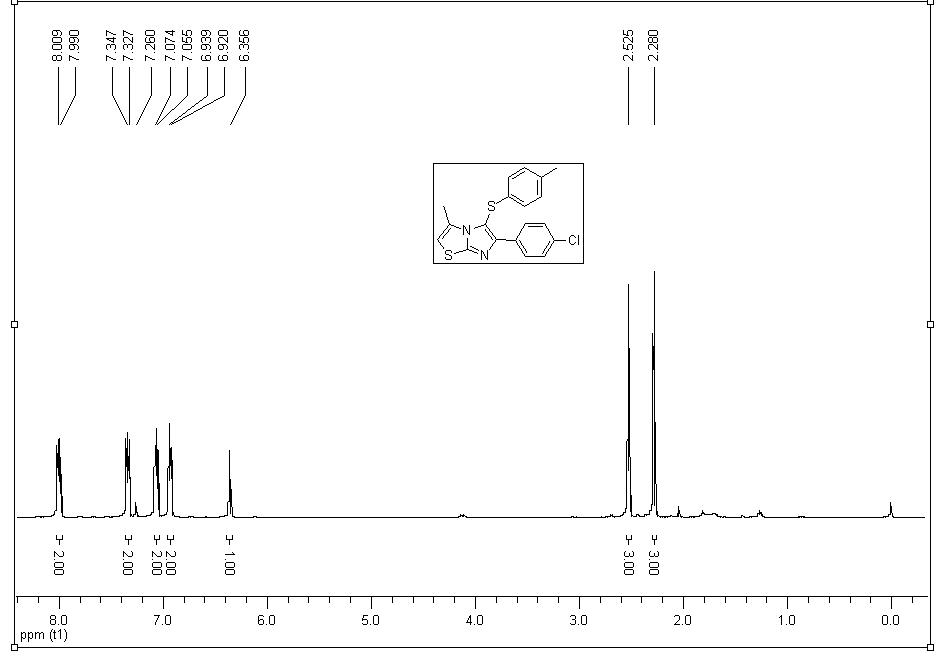


**Figure S 23:** 1H NMR of **3l**


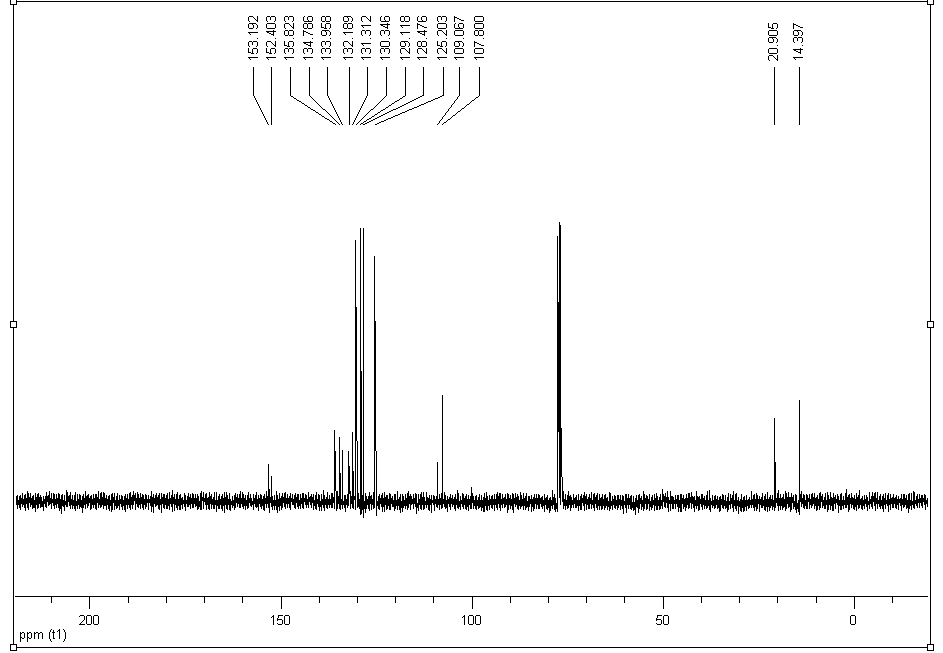


**Figure S 24:** 13C NMR of **3l**


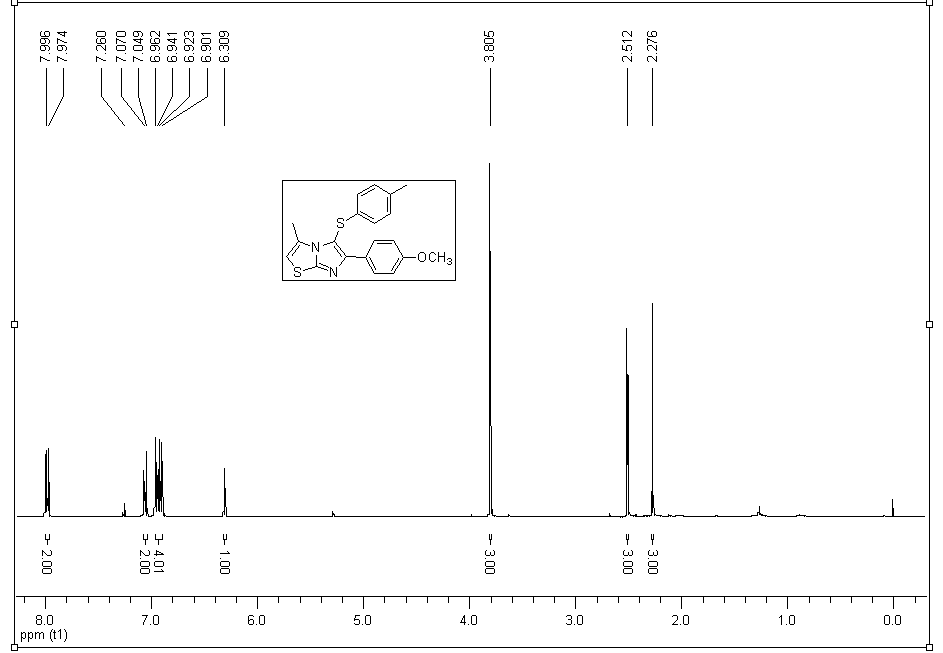


**Figure S 25:** 1H NMR of **3m**


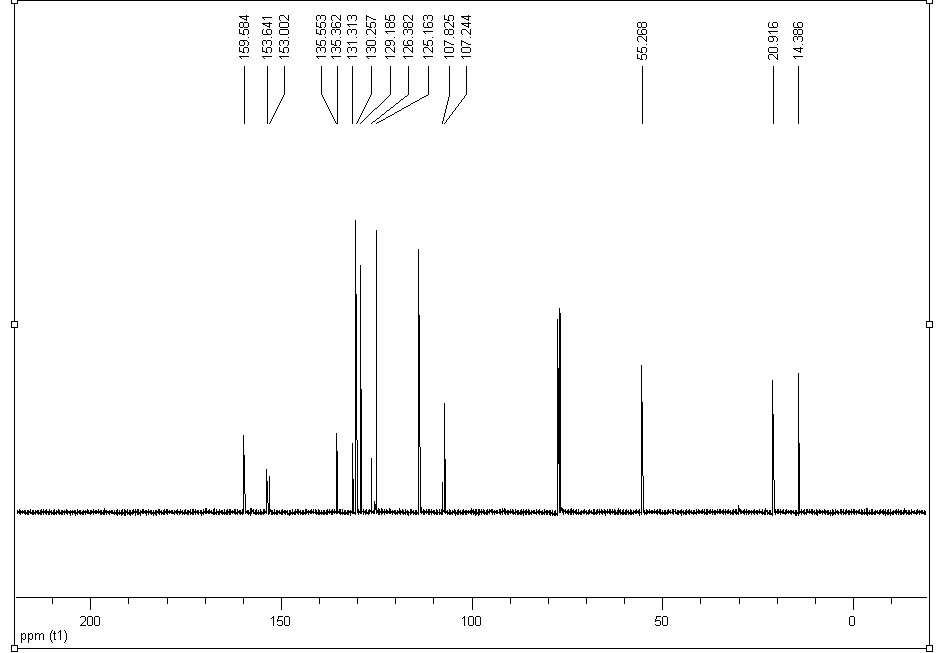


**Figure S 26:** 13C NMR of **3m**


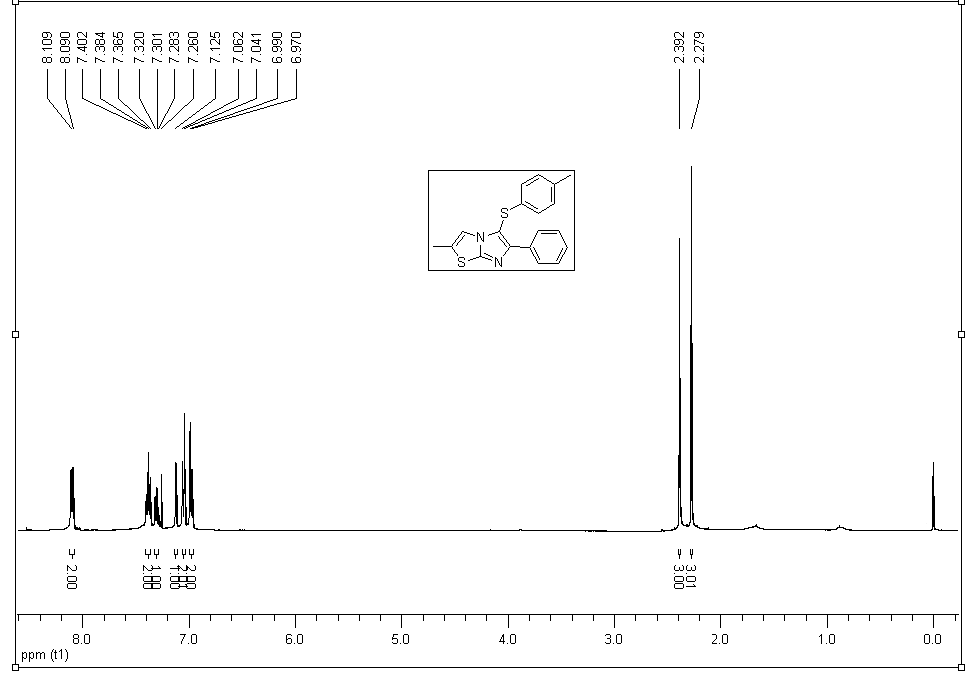


**Figure S 27:** 1H NMR of **3n**


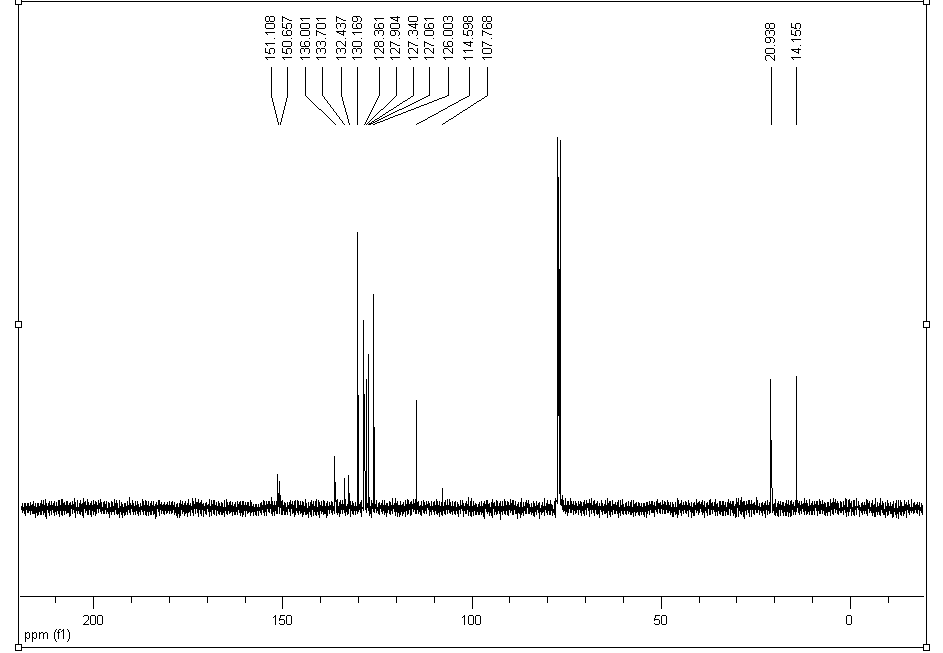


**Figure S 28:** 13C NMR of **3n**


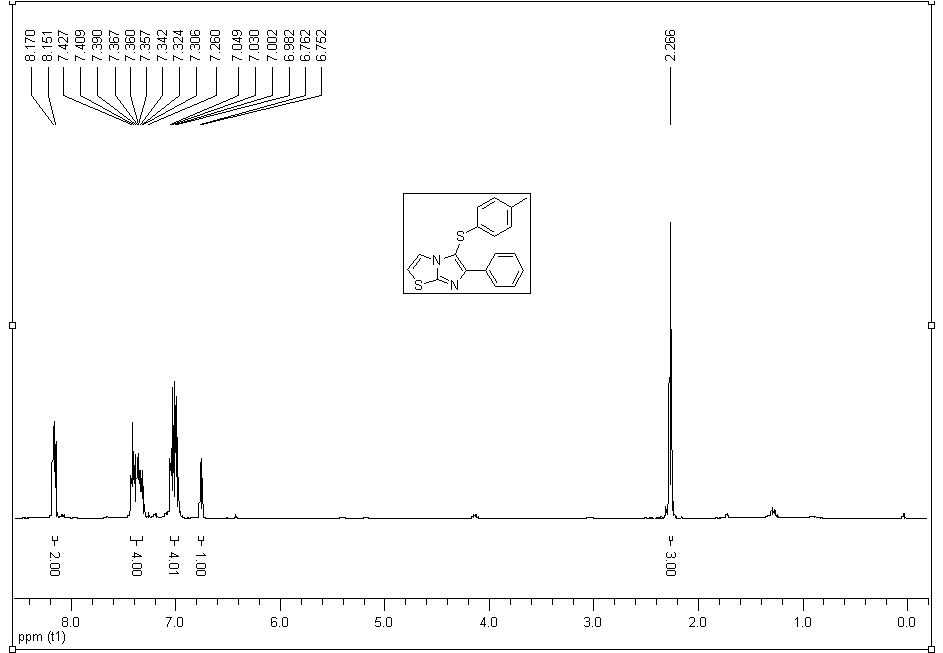


**Figure S 29:** 1H NMR of **3o**


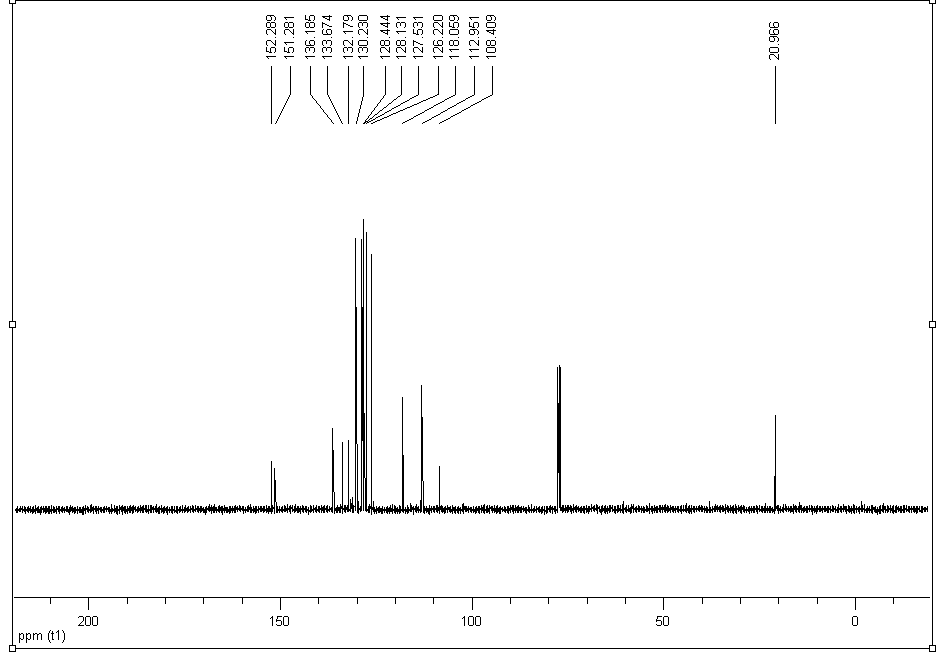


**Figure S 30:** 13C NMR of **3o**


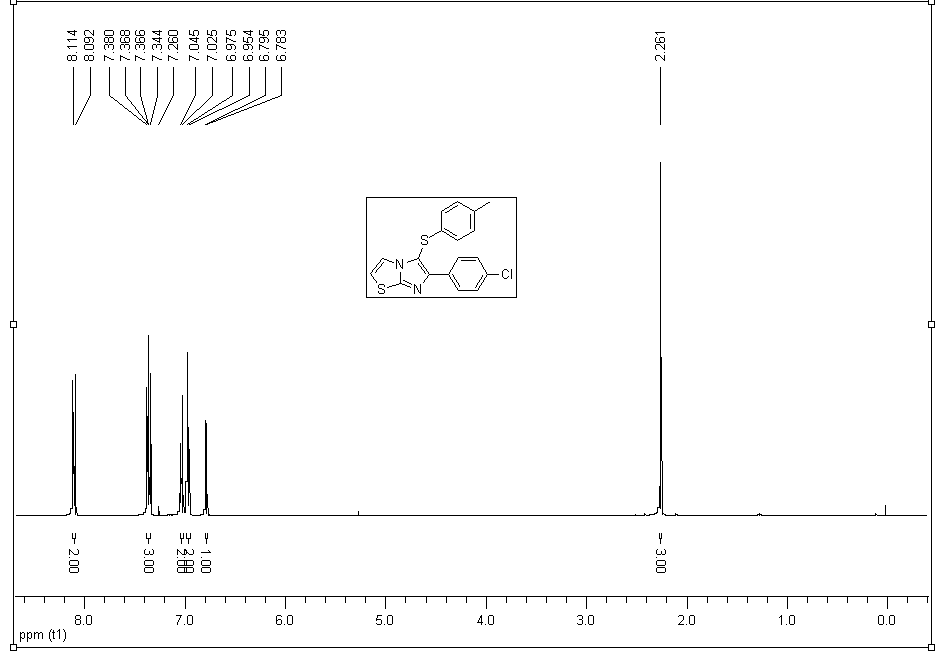


**Figure S 31:** 1H NMR of **3p**


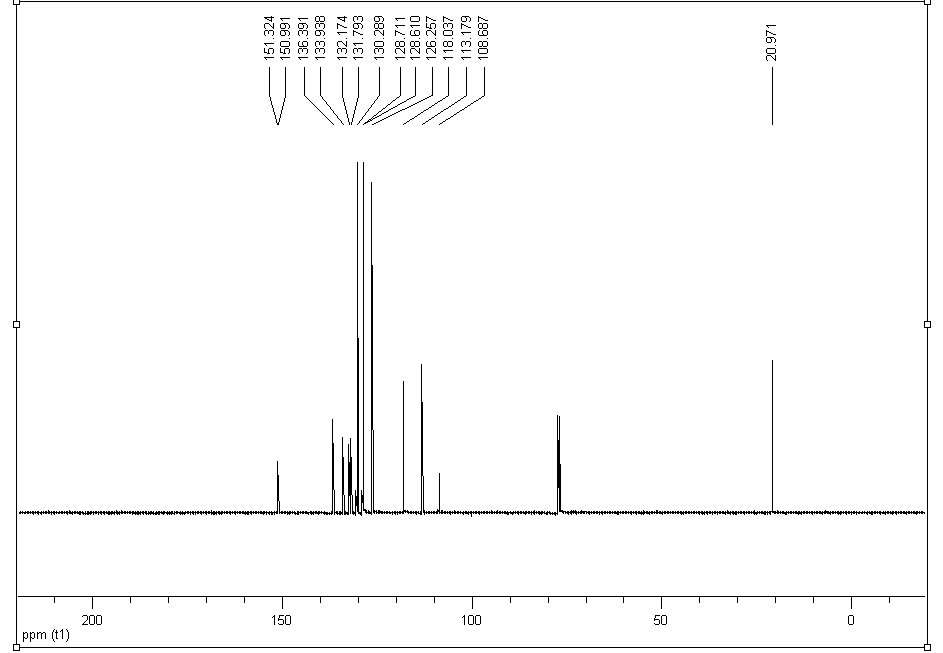


**Figure S 32:** 13C NMR of **3p**


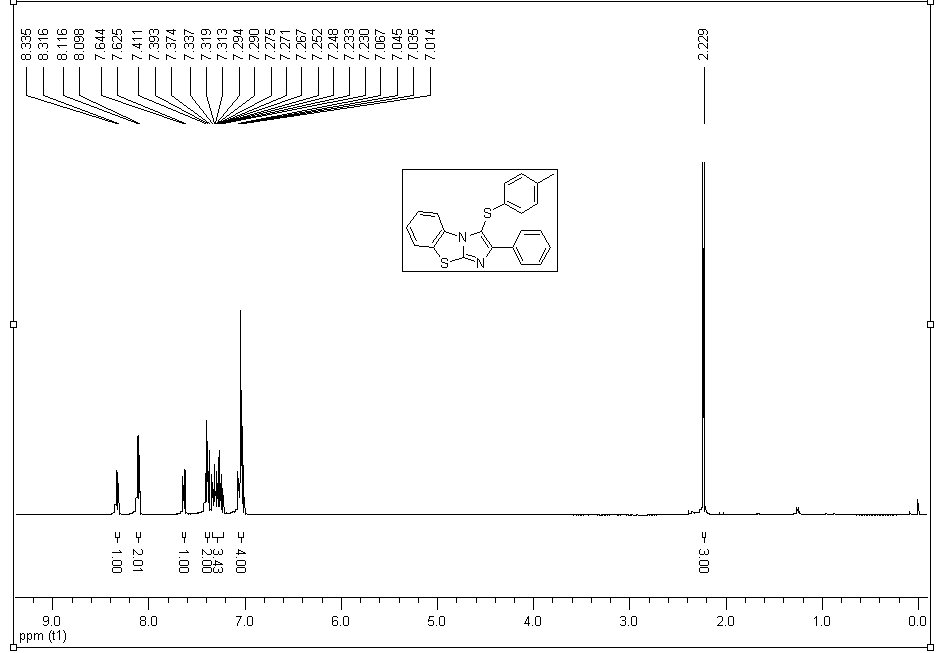


**Figure S 33:** 1H NMR of **3q**


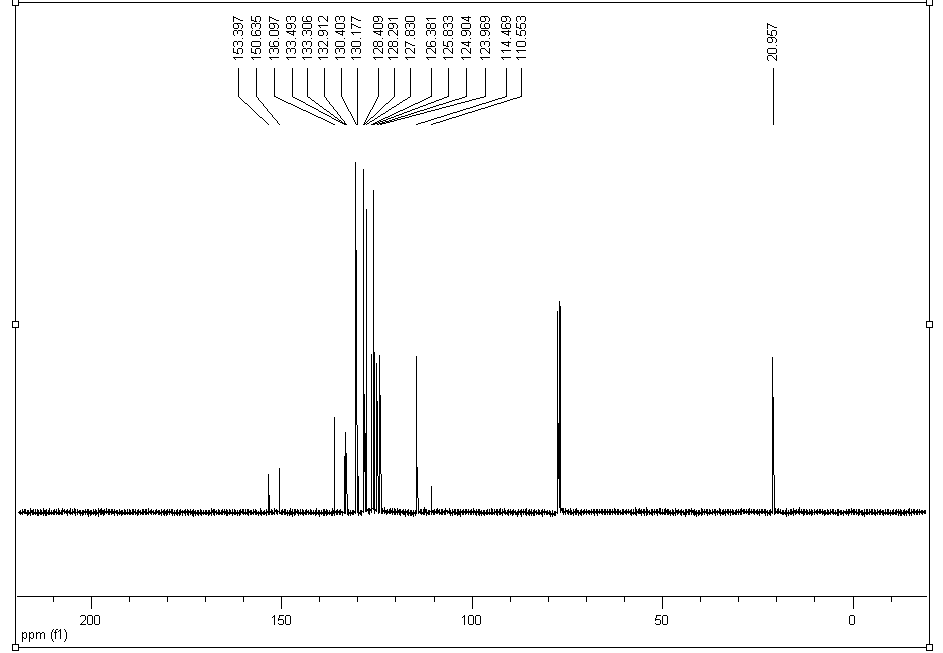


**Figure S 34:** 13C NMR of **3q**


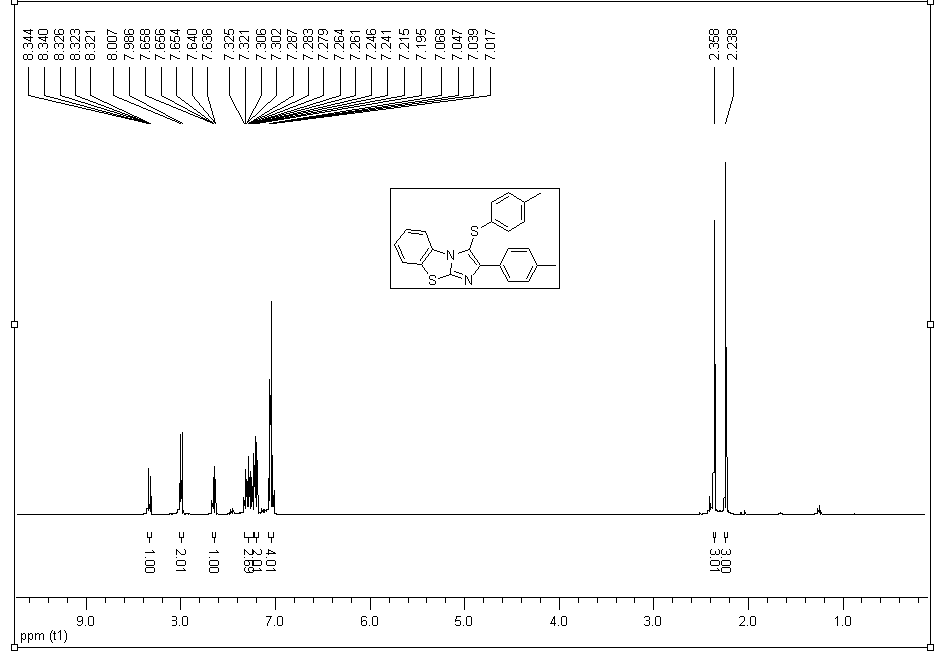


**Figure S 35:** 1H NMR of **3r**


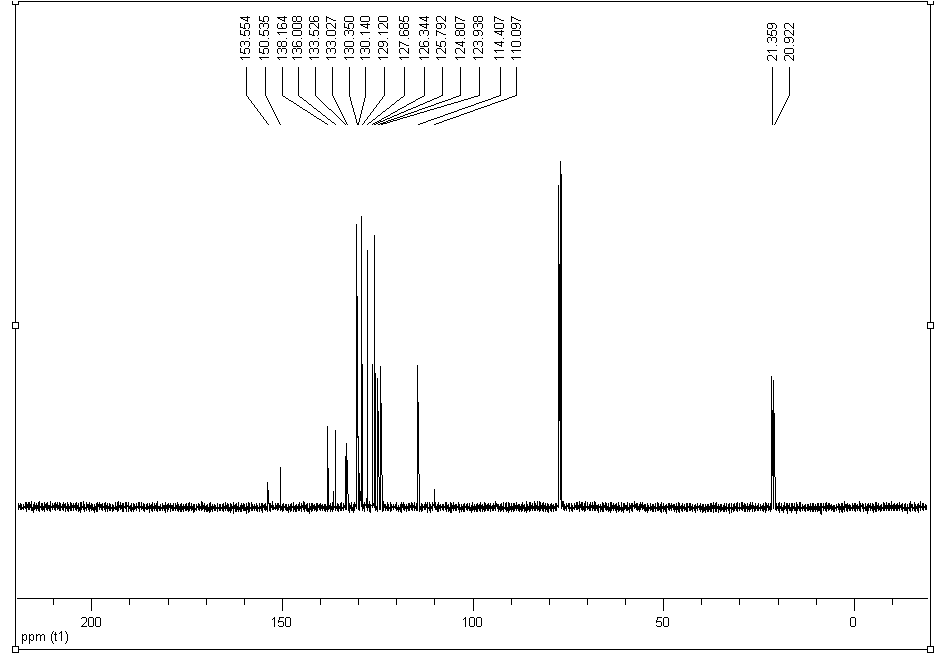


**Figure S 36:** 13C NMR of **3r**


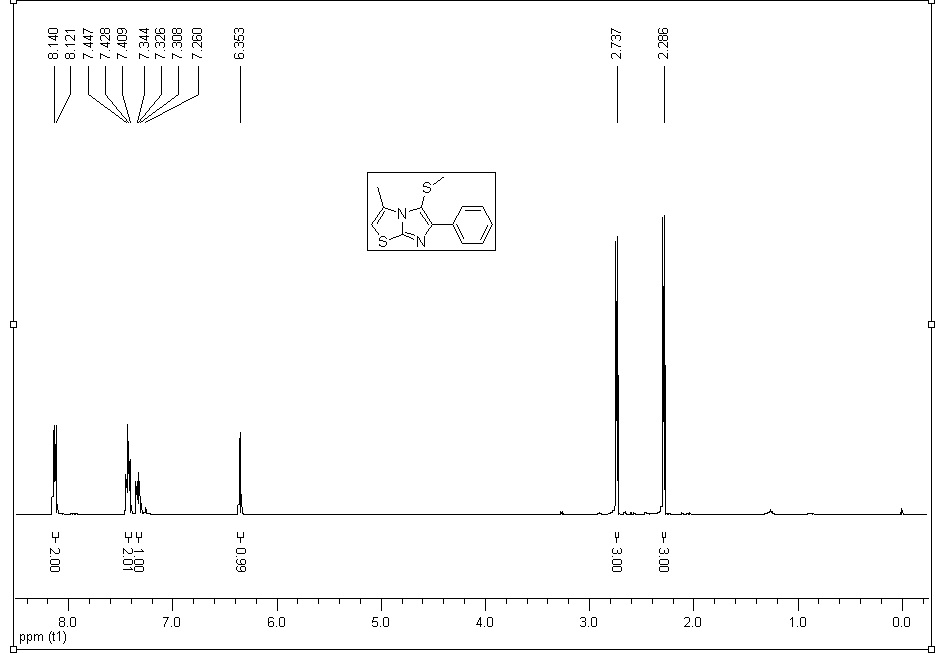


**Figure S 37:** 1H NMR of **5a**


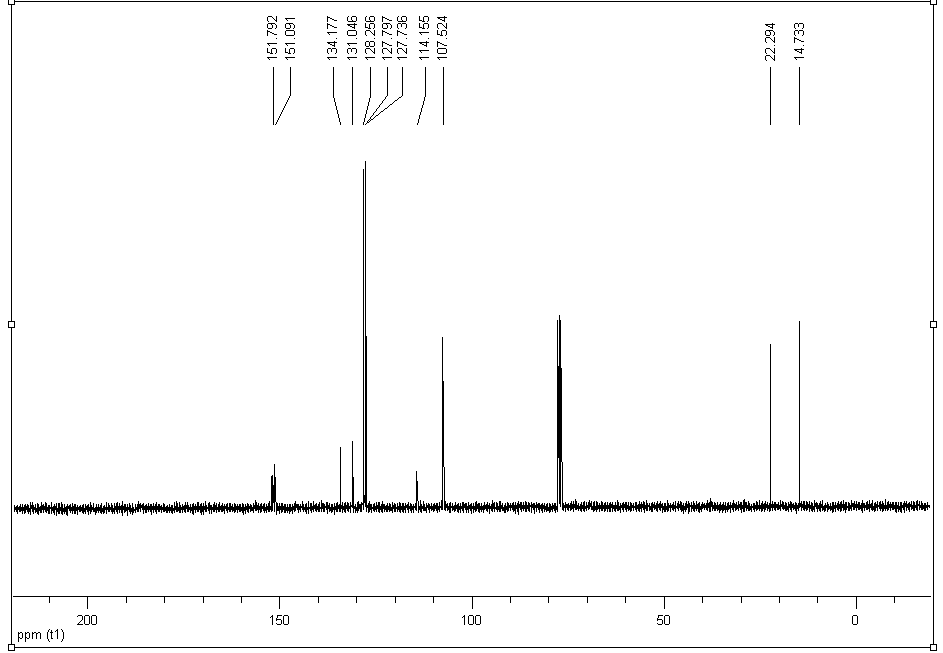


**Figure S 38:** 13C NMR of **5a**


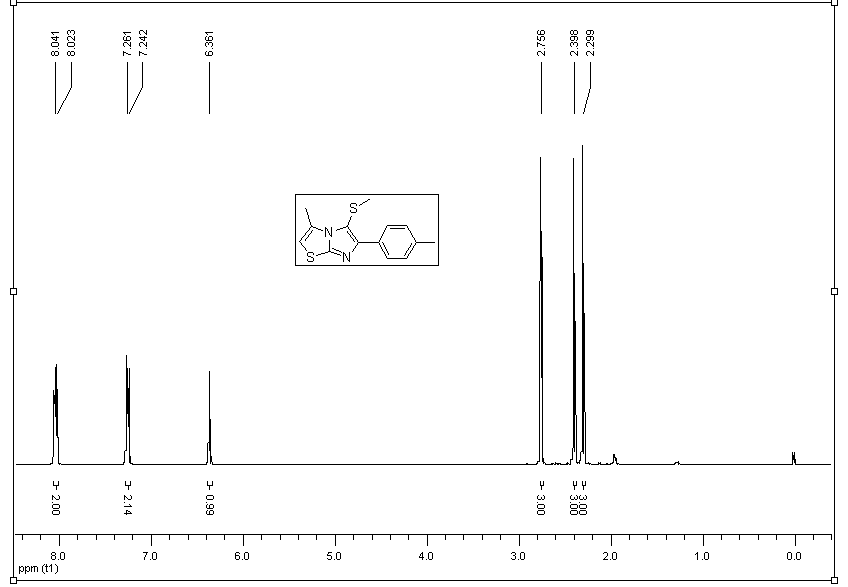


**Figure S 39:** 1H NMR of **5b**


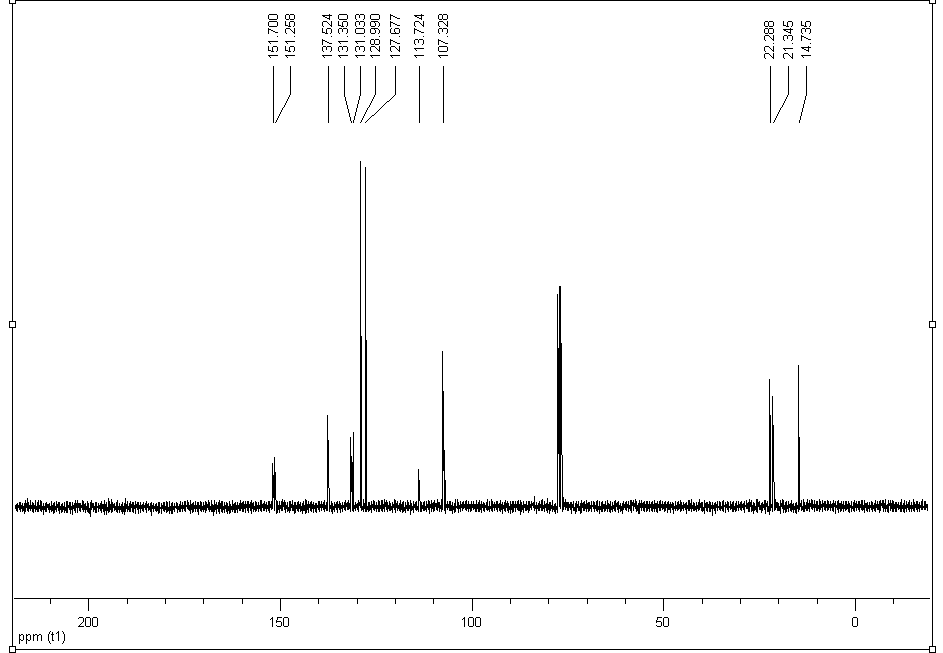


**Figure S 40:** 13C NMR of **5b**


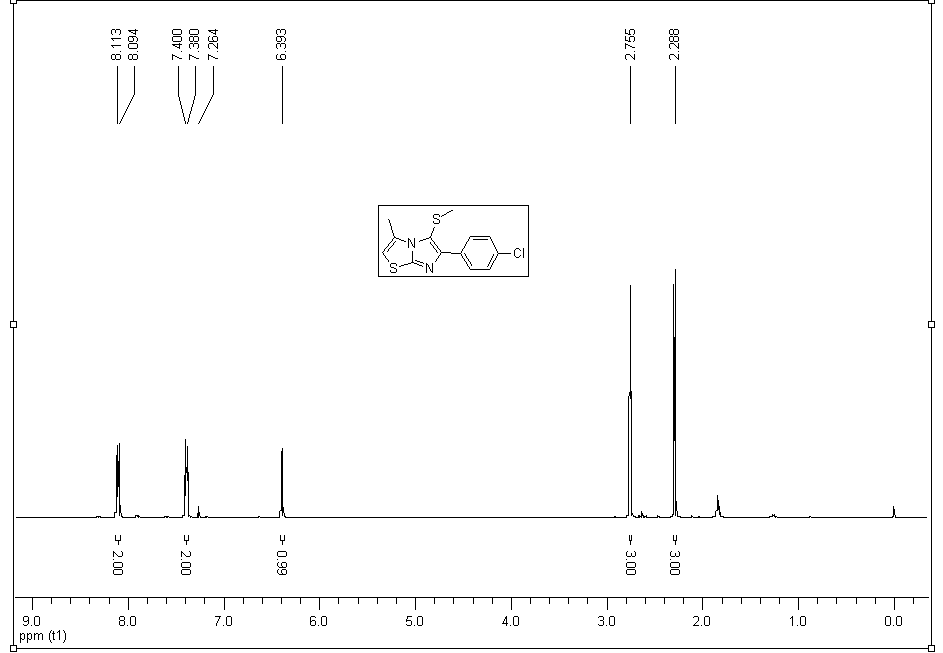


**Figure S 41:** 1H NMR of **5c**


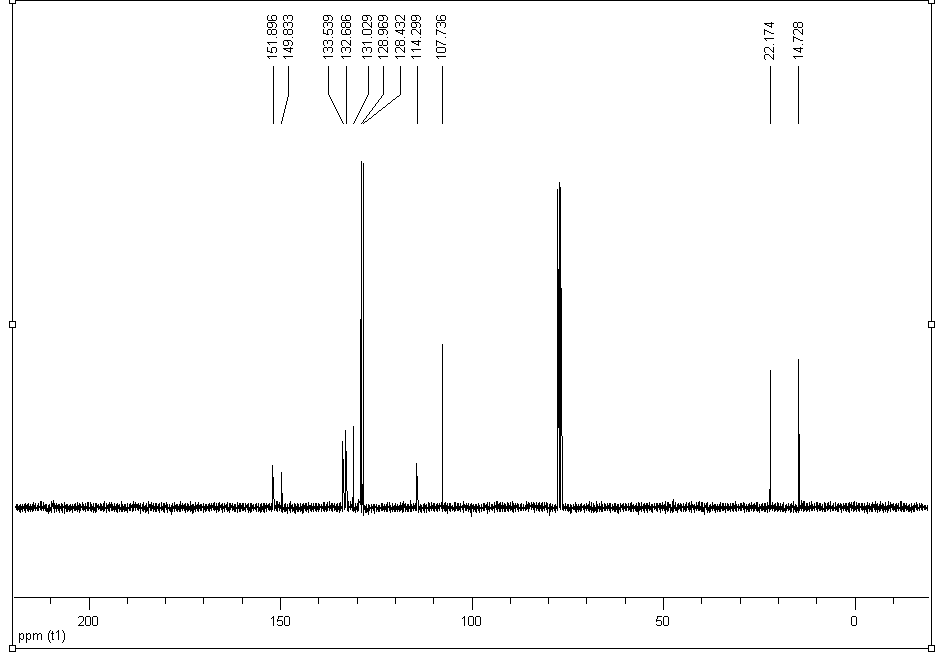

**Figure S 42:** 13C NMR of **5c**


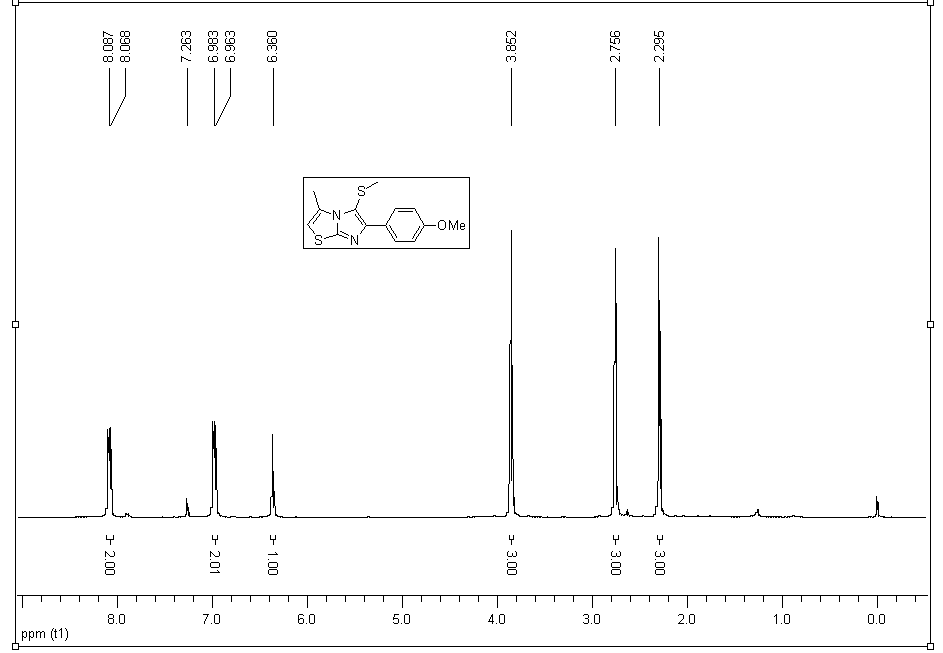


**Figure S 43:** 1H NMR of **5d**


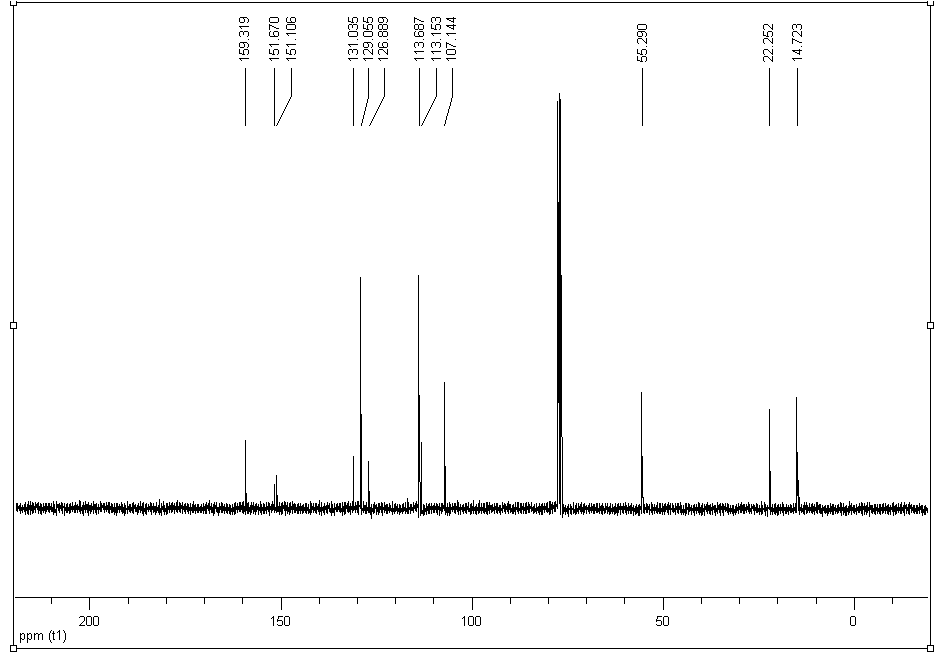


**Figure S 44:** 13C NMR of **5d**


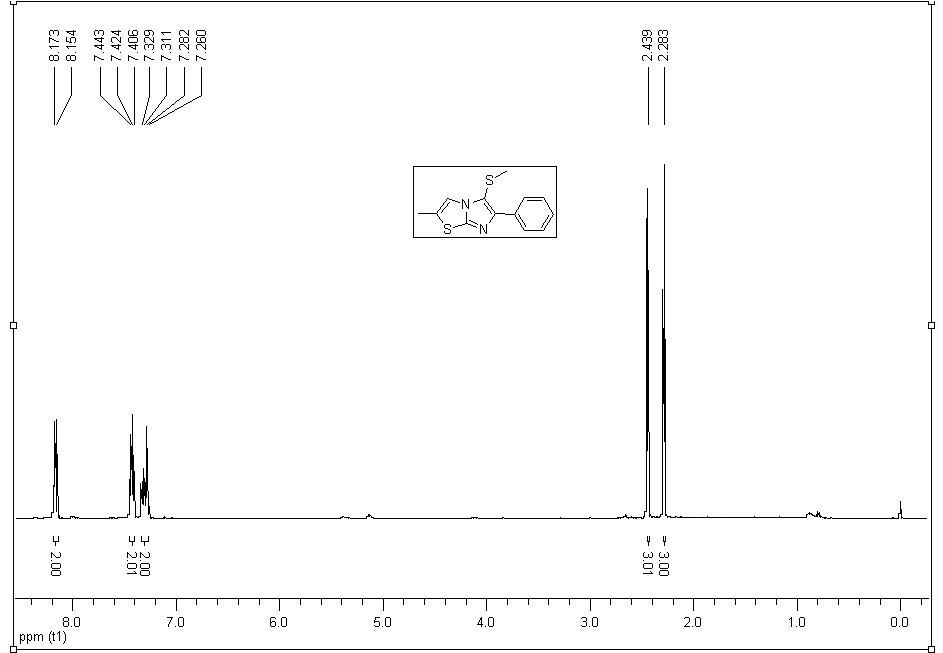


**Figure S 45:** 1H NMR of **5e**


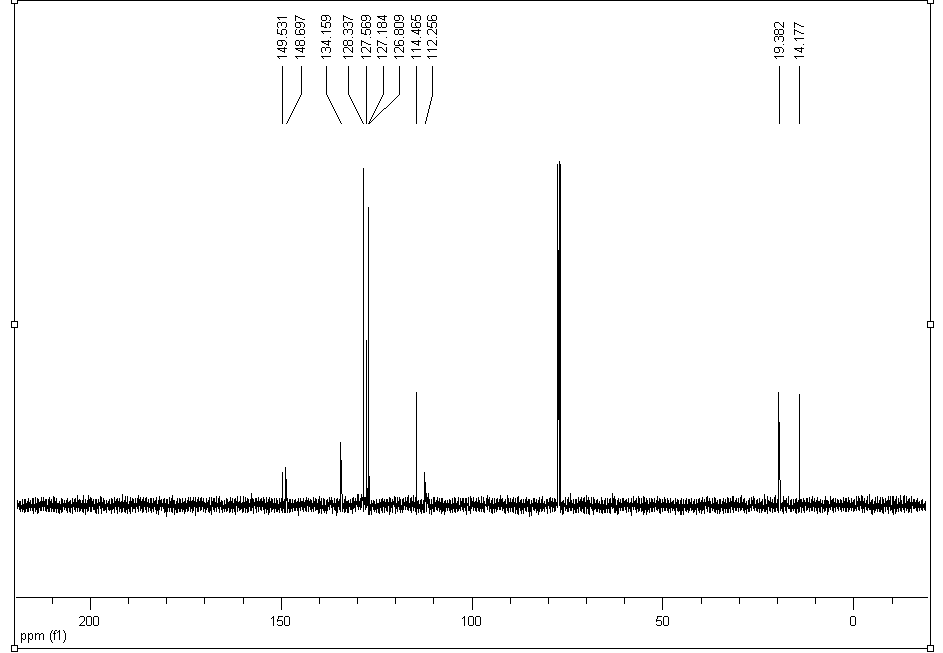


**Figure S 46:** 13C NMR of **5e**


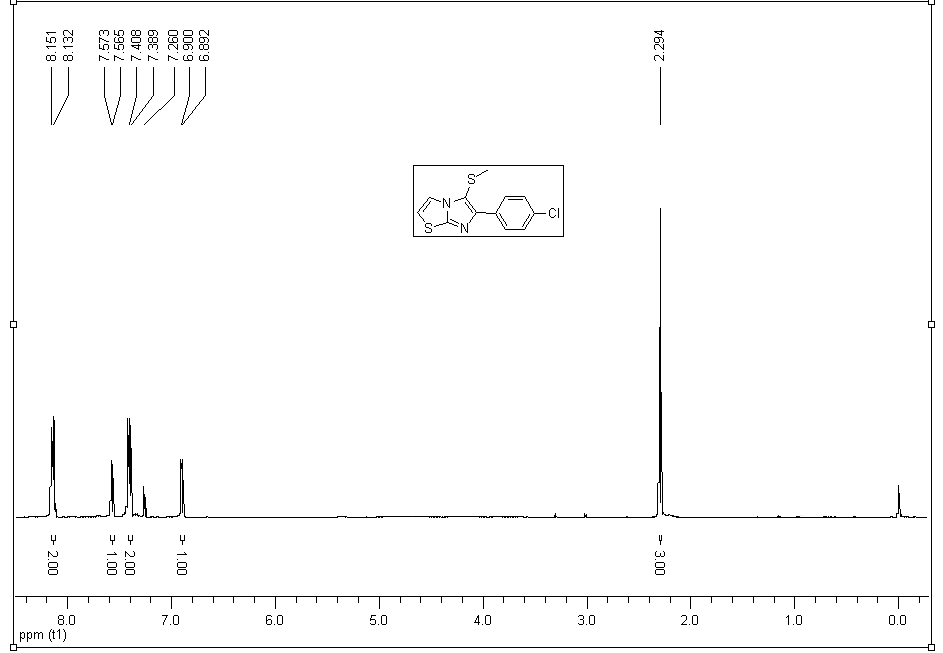


**Figure S 47:** 1H NMR of **5f**


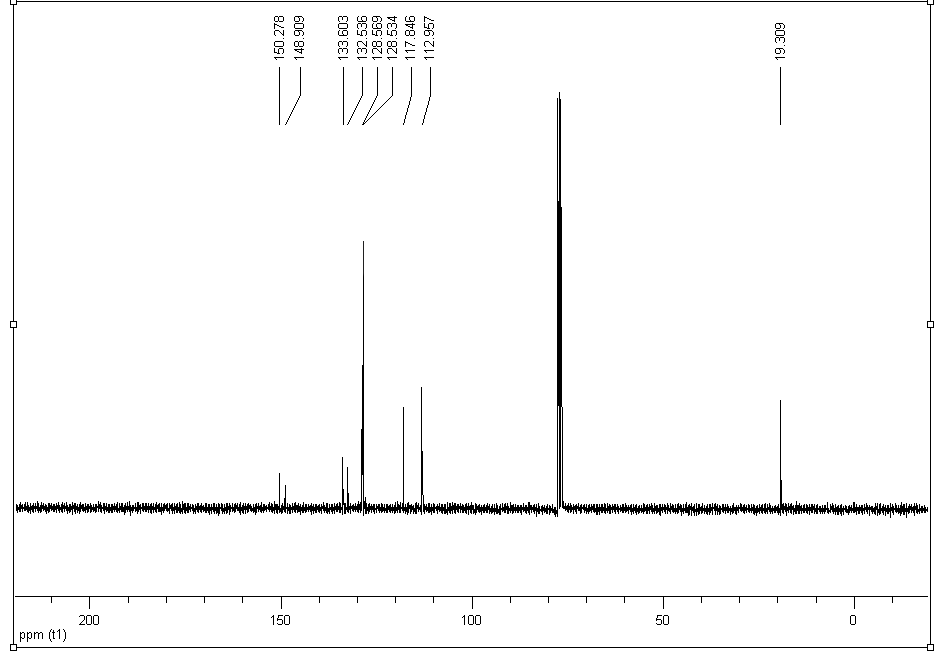


**Figure S 48:** 13C NMR of **5f**
